# Supplementary material
Source: PubMed Central journal article supplement (PMC2645867)
Supplement: NIHMS79169-supplement-02.pdf [file NIHMS79169-supplement-02.pdf]

Supplemental Table 1. Total and modified spectral counts for each lysine residue in p300. "ND" indicates that the amino acid was not detected in any of the analyses in either the acetylated or unmodified state.

| p300 Residue | Overall Detection              |                              |                                   | Modification Summary (Sum)          |                    |                                              |                                                |                               |                                          |                                              |                                                |                               |                                                     | NOT MODIFIED (Trypsin, Chymotrypsin, GluC) |                     |                     | PREP1 AC TI          |                     |                     | PREP1 DEAC TI        |                     |                     | PREP2 AC SUM (Trypsin, Chymotrypsin, GluC) |                     |                     | PREP2 DEAC SUM (Trypsin, Chymotrypsin, GluC) |                     |                     | PREP3 AC SUM (Trypsin, Chymotrypsin, GluC) |                     |                     | PREP3 DEAC SUM (Trypsin, Chymotrypsin, GluC) |                     |                     |   |
|--------------|--------------------------------|------------------------------|-----------------------------------|-------------------------------------|--------------------|----------------------------------------------|------------------------------------------------|-------------------------------|------------------------------------------|----------------------------------------------|------------------------------------------------|-------------------------------|-----------------------------------------------------|--------------------------------------------|---------------------|---------------------|----------------------|---------------------|---------------------|----------------------|---------------------|---------------------|--------------------------------------------|---------------------|---------------------|----------------------------------------------|---------------------|---------------------|--------------------------------------------|---------------------|---------------------|----------------------------------------------|---------------------|---------------------|---|
|              | Number of times detected (All) | Total times acetylated (All) | Total times detected (Ac samples) | Total times acetylated (Ac samples) | % MOD (Ac samples) | Total times detected (SIRT2 treated samples) | Total times Acetylated (SIRT2 treated samples) | % MOD (SIRT2 treated samples) | % of Total p300 acetylation (Ac samples) | Total times detected (SIRT2 treated samples) | Total times Acetylated (SIRT2 treated samples) | % MOD (SIRT2 treated samples) | % of Total p300 acetylation (SIRT2 treated samples) | TOTAL TIMES DETECTED                       | ACETYLATED PEPTIDES | % MODIFIED PEPTIDES | TOTAL TIMES DETECTED | ACETYLATED PEPTIDES | % MODIFIED PEPTIDES | TOTAL TIMES DETECTED | ACETYLATED PEPTIDES | % MODIFIED PEPTIDES | TOTAL TIMES DETECTED                       | ACETYLATED PEPTIDES | % MODIFIED PEPTIDES | TOTAL TIMES DETECTED                         | ACETYLATED PEPTIDES | % MODIFIED PEPTIDES | TOTAL TIMES DETECTED                       | ACETYLATED PEPTIDES | % MODIFIED PEPTIDES | TOTAL TIMES DETECTED                         | ACETYLATED PEPTIDES | % MODIFIED PEPTIDES |   |
|              | Ac                             | Ac                           | Ac                                | Ac                                  | Ac                 | Ac                                           | Ac                                             | Ac                            | Ac                                       | Ac                                           | Ac                                             | Ac                            | Ac                                                  | Ac                                         | Ac                  | Ac                  | Ac                   | Ac                  | Ac                  | Ac                   | Ac                  | Ac                  | Ac                                         | Ac                  | Ac                  | Ac                                           | Ac                  | Ac                  | Ac                                         | Ac                  | Ac                  | Ac                                           | Ac                  | Ac                  |   |
| 14 K         | 4                              | 0                            | 0                                 | 0                                   | 0.00%              | 4                                            | 0                                              | 0.00%                         | 0.00%                                    | 4                                            | 0                                              | 0.00%                         | 0.00%                                               | 0                                          | 0                   | 0.00%               | 0                    | 0                   | 0.00%               | 0                    | 0                   | 0.00%               | 0                                          | 0                   | 0                   | 0                                            | 0                   | 0                   | 0                                          | 0                   | 0                   | 0                                            | 0                   | 0                   | 0 |
| 17 K**       | 4                              | 0                            | 0                                 | 0                                   | 0.00%              | 4                                            | 0                                              | 0.00%                         | 0.00%                                    | 4                                            | 0                                              | 0.00%                         | 0.00%                                               | 0                                          | 0                   | 0.00%               | 0                    | 0                   | 0.00%               | 0                    | 0                   | 0.00%               | 0                                          | 0                   | 0                   | 0                                            | 0                   | 0                   | 0                                          | 0                   | 0                   | 0                                            | 0                   | 0                   | 0 |
| 77 K         | 77                             | 10                           | 41                                | 9                                   | 21.95%             | 35                                           | 1                                              | 2.86%                         | 0.29%                                    | 35                                           | 1                                              | 2.86%                         | 0.29%                                               | 1                                          | 0                   | 0.00%               | 0                    | 0                   | 0.00%               | 0                    | 0                   | 0.00%               | 30                                         | 6                   | 20.00%              | 4                                            | 0                   | 0.00%               | 11                                         | 3                   | 27.27%              | 31                                           | 1                   | 3.23%               |   |
| 79 K**       | 85                             | 11                           | 49                                | 11                                  | 22.45%             | 35                                           | 0                                              | 0.00%                         | 0.00%                                    | 35                                           | 0                                              | 0.00%                         | 0.00%                                               | 1                                          | 0                   | 0.00%               | 4                    | 4                   | 100.00%             | 0                    | 0                   | 0.00%               | 33                                         | 6                   | 18.18%              | 4                                            | 0                   | 0.00%               | 12                                         | 1                   | 8.33%               | 31                                           | 0                   | 0.00%               |   |
| 123 K        | 136                            | 0                            | 71                                | 0                                   | 0.00%              | 46                                           | 0                                              | 0.00%                         | 0.00%                                    | 19                                           | 0                                              | 0.00%                         | 0.00%                                               | 19                                         | 0                   | 0.00%               | 24                   | 0                   | 0.00%               | 9                    | 0                   | 0.00%               | 31                                         | 0                   | 0.00%               | 32                                           | 0                   | 0.00%               | 32                                         | 0                   | 0.00%               | 6                                            | 0                   | 0.00%               |   |
| 243 K        | 14                             | 0                            | 3                                 | 0                                   | 0.00%              | 10                                           | 0                                              | 0.00%                         | 0.00%                                    | 10                                           | 0                                              | 0.00%                         | 0.00%                                               | 1                                          | 0                   | 0.00%               | 0                    | 0                   | 0.00%               | 7                    | 0                   | 0.00%               | 0                                          | 0                   | 0.00%               | 2                                            | 0                   | 0.00%               | 3                                          | 0                   | 0.00%               | 1                                            | 0                   | 0.00%               |   |
| 277 K        | 82                             | 0                            | 55                                | 0                                   | 0.00%              | 24                                           | 0                                              | 0.00%                         | 0.00%                                    | 24                                           | 0                                              | 0.00%                         | 0.00%                                               | 3                                          | 0                   | 0.00%               | 24                   | 0                   | 0.00%               | 24                   | 0                   | 0.00%               | 6                                          | 0                   | 0.00%               | 17                                           | 0                   | 0.00%               | 25                                         | 0                   | 0.00%               | 2                                            | 0                   | 0.00%               |   |
| 291 K        | 75                             | 1                            | 48                                | 1                                   | 2.08%              | 24                                           | 0                                              | 0.00%                         | 0.00%                                    | 24                                           | 0                                              | 0.00%                         | 0.00%                                               | 3                                          | 0                   | 0.00%               | 17                   | 0                   | 0.00%               | 6                    | 0                   | 0.00%               | 15                                         | 0                   | 0.00%               | 15                                           | 0                   | 0.00%               | 16                                         | 1                   | 6.25%               | 3                                            | 0                   | 0.00%               |   |
| 292 K**      | 42                             | 1                            | 18                                | 1                                   | 5.56%              | 23                                           | 0                                              | 0.00%                         | 0.00%                                    | 23                                           | 0                                              | 0.00%                         | 0.00%                                               | 1                                          | 0                   | 0.00%               | 2                    | 0                   | 0.00%               | 9                    | 0                   | 0.00%               | 7                                          | 1                   | 14.29%              | 1                                            | 0                   | 0.00%               | 9                                          | 0                   | 0.00%               | 13                                           | 0                   | 0.00%               |   |
| 334 K        | 59                             | 0                            | 19                                | 0                                   | 0.00%              | 38                                           | 0                                              | 0.00%                         | 0.00%                                    | 2                                            | 0                                              | 0.00%                         | 0.00%                                               | 2                                          | 0                   | 0.00%               | 0                    | 0                   | 0.00%               | 14                   | 0                   | 0.00%               | 7                                          | 0                   | 0.00%               | 11                                           | 0                   | 0.00%               | 11                                         | 0                   | 0.00%               | 13                                           | 0                   | 0.00%               |   |
| 336 K**      | 4                              | 4                            | 3                                 | 3                                   | 100.00%            | 1                                            | 1                                              | 100.00%                       | 0.29%                                    | 0                                            | 0                                              | 0.00%                         | 0.00%                                               | 0                                          | 0                   | 0.00%               | 0                    | 0                   | 0.00%               | 0                    | 0                   | 0.00%               | 0                                          | 0                   | 0.00%               | 1                                            | 1                   | 100.00%             | 3                                          | 3                   | 100.00%             | 0                                            | 0                   | 0.00%               |   |
| 350 K        | 384                            | 57                           | 84                                | 19                                  | 22.62%             | 300                                          | 38                                             | 12.67%                        | 11.14%                                   | 300                                          | 38                                             | 12.67%                        | 11.14%                                              | 0                                          | 0                   | 0.00%               | 0                    | 0                   | 0.00%               | 50                   | 0                   | 0.00%               | 6                                          | 0                   | 0.00%               | 88                                           | 17                  | 19.32%              | 78                                         | 19                  | 24.36%              | 162                                          | 21                  | 12.96%              |   |
| 373 K**      | 43                             | 43                           | 33                                | 33                                  | 100.00%            | 10                                           | 10                                             | 100.00%                       | 2.93%                                    | 10                                           | 10                                             | 100.00%                       | 2.93%                                               | 0                                          | 0                   | 0.00%               | 3                    | 3                   | 100.00%             | 0                    | 0                   | 0.00%               | 9                                          | 9                   | 100.00%             | 9                                            | 9                   | 100.00%             | 21                                         | 21                  | 100.00%             | 1                                            | 1                   | 100.00%             |   |
| 386 K        | 139                            | 58                           | 86                                | 44                                  | 51.16%             | 49                                           | 14                                             | 28.57%                        | 4.11%                                    | 49                                           | 14                                             | 28.57%                        | 4.11%                                               | 4                                          | 0                   | 0.00%               | 6                    | 0                   | 0.00%               | 7                    | 0                   | 0.00%               | 21                                         | 16                  | 76.19%              | 36                                           | 13                  | 36.11%              | 59                                         | 28                  | 47.46%              | 6                                            | 1                   | 16.67%              |   |
| 404 K**      | 4                              | 6                            | 4                                 | 4                                   | 66.67%             | 0                                            | 0                                              | 0.00%                         | 0.00%                                    | 0                                            | 0                                              | 0.00%                         | 0.00%                                               | 0                                          | 0                   | 0.00%               | 0                    | 0                   | 0.00%               | 2                    | 2                   | 100.00%             | 0                                          | 0                   | 0.00%               | 0                                            | 0                   | 0.00%               | 4                                          | 2                   | 50.00%              | 0                                            | 0                   | 0.00%               |   |
| 418 K**      | 131                            | 47                           | 82                                | 39                                  | 47.56%             | 48                                           | 8                                              | 16.67%                        | 2.35%                                    | 48                                           | 8                                              | 16.67%                        | 2.35%                                               | 1                                          | 0                   | 0.00%               | 12                   | 4                   | 33.33%              | 8                    | 0                   | 0.00%               | 24                                         | 13                  | 54.17%              | 19                                           | 6                   | 31.58%              | 46                                         | 22                  | 47.83%              | 21                                           | 2                   | 9.52%               |   |
| 423 K**      | 73                             | 44                           | 49                                | 40                                  | 81.63%             | 24                                           | 4                                              | 16.67%                        | 1.17%                                    | 24                                           | 4                                              | 16.67%                        | 1.17%                                               | 0                                          | 0                   | 0.00%               | 4                    | 3                   | 75.00%              | 0                    | 0                   | 0.00%               | 17                                         | 15                  | 88.24%              | 8                                            | 4                   | 50.00%              | 28                                         | 22                  | 78.57%              | 16                                           | 0                   | 0.00%               |   |
| 489 K        | 117                            | 2                            | 75                                | 2                                   | 2.67%              | 39                                           | 0                                              | 0.00%                         | 0.00%                                    | 39                                           | 0                                              | 0.00%                         | 0.00%                                               | 3                                          | 0                   | 0.00%               | 29                   | 1                   | 3.45%               | 5                    | 0                   | 0.00%               | 22                                         | 0                   | 0.00%               | 32                                           | 0                   | 0.00%               | 24                                         | 1                   | 4.17%               | 2                                            | 0                   | 0.00%               |   |
| 569 K        | 33                             | 8                            | 21                                | 8                                   | 38.10%             | 9                                            | 0                                              | 0.00%                         | 0.00%                                    | 9                                            | 0                                              | 0.00%                         | 0.00%                                               | 3                                          | 0                   | 0.00%               | 13                   | 0                   | 0.00%               | 9                    | 0                   | 0.00%               | 3                                          | 3                   | 100.00%             | 0                                            | 0                   | 0.00%               | 5                                          | 5                   | 100.00%             | 0                                            | 0                   | 0.00%               |   |
| 586 K        | 13                             | 2                            | 8                                 | 2                                   | 25.00%             | 0                                            | 0                                              | 0.00%                         | 0.00%                                    | 0                                            | 0                                              | 0.00%                         | 0.00%                                               | 0                                          | 0                   | 0.00%               | 0                    | 0                   | 0.00%               | 0                    | 0                   | 0.00%               | 0                                          | 0                   | 0.00%               | 0                                            | 0                   | 0.00%               | 2                                          | 2                   | 100.00%             | 4                                            | 4                   | 100.00%             |   |
| 601 K        | 255                            | 35                           | 210                               | 35                                  | 16.67%             | 36                                           | 0                                              | 0.00%                         | 0.00%                                    | 36                                           | 0                                              | 0.00%                         | 0.00%                                               | 9                                          | 0                   | 0.00%               | 109                  | 10                  | 9.17%               | 16                   | 0                   | 0.00%               | 45                                         | 9                   | 20.00%              | 17                                           | 0                   | 0.00%               | 56                                         | 16                  | 28.57%              | 3                                            | 0                   | 0.00%               |   |
| 614 K        | 315                            | 10                           | 209                               | 5                                   | 2.39%              | 99                                           | 5                                              | 5.05%                         | 1.47%                                    | 99                                           | 5                                              | 5.05%                         | 1.47%                                               | 7                                          | 0                   | 0.00%               | 18                   | 0                   | 0.00%               | 12                   | 2                   | 16.67%              | 111                                        | 3                   | 2.70%               | 37                                           | 5                   | 13.51%              | 80                                         | 2                   | 2.50%               | 50                                           | 0                   | 0.00%               |   |
| 636 K**      | 70                             | 1                            | 40                                | 0                                   | 0.00%              | 24                                           | 1                                              | 4.17%                         | 0.29%                                    | 24                                           | 1                                              | 4.17%                         | 0.29%                                               | 6                                          | 0                   | 0.00%               | 10                   | 0                   | 0.00%               | 2                    | 1                   | 50.00%              | 13                                         | 0                   | 0.00%               | 3                                            | 0                   | 0.00%               | 17                                         | 0                   | 0.00%               | 19                                           | 0                   | 0.00%               |   |
| 639 K        | 23                             | 0                            | 10                                | 0                                   | 0.00%              | 13                                           | 0                                              | 0.00%                         | 0.00%                                    | 13                                           | 0                                              | 0.00%                         | 0.00%                                               | 0                                          | 0                   | 0.00%               | 0                    | 0                   | 0.00%               | 1                    | 0                   | 0.00%               | 5                                          | 0                   | 0.00%               | 0                                            | 0                   | 0.00%               | 5                                          | 0                   | 0.00%               | 12                                           | 0                   | 0.00%               |   |
| 642 K        | 29                             | 0                            | 10                                | 0                                   | 0.00%              | 12                                           | 0                                              | 0.00%                         | 0.00%                                    | 12                                           | 0                                              | 0.00%                         | 0.00%                                               | 0                                          | 0                   | 0.00%               | 0                    | 0                   | 0.00%               | 0                    | 0                   | 0.00%               | 5                                          | 0                   | 0.00%               | 0                                            | 0                   | 0.00%               | 5                                          | 0                   | 0.00%               | 12                                           | 0                   | 0.00%               |   |
| 647 K        | ND                             | ND                           | ND                                | ND                                  | ND                 | ND                                           | ND                                             | ND                            | ND                                       | ND                                           | ND                                             | ND                            | ND                                                  | 0                                          | 0                   | 0.00%               | 0                    | 0                   | 0.00%               | 0                    | 0                   | 0.00%               | 0                                          | 0                   | 0.00%               | 0                                            | 0                   | 0.00%               | 0                                          | 0                   | 0.00%               | 0                                            | 0                   | 0.00%               |   |
| 654 K        | ND                             | ND                           | ND                                | ND                                  | ND                 | ND                                           | ND                                             | ND                            | ND                                       | ND                                           | ND                                             | ND                            | ND                                                  | 0                                          | 0                   | 0.00%               | 0                    | 0                   | 0.00%               | 0                    | 0                   | 0.00%               | 0                                          | 0                   | 0.00%               | 0                                            | 0                   | 0.00%               | 0                                          | 0                   | 0.00%               | 0                                            | 0                   | 0.00%               |   |
| 970 K        | 29                             | 2                            | 14                                | 2                                   | 14.29%             | 14                                           | 0                                              | 0.00%                         | 0.00%                                    | 14                                           | 0                                              | 0.00%                         | 0.00%                                               | 1                                          | 0                   | 0.00%               | 0                    | 0                   | 0.00%               | 0                    | 0                   | 0.00%               | 14                                         | 2                   | 14.29%              | 0                                            | 0                   | 0.00%               | 0                                          | 0                   | 0.00%               | 14                                           | 0                   | 0.00%               |   |
| 977 K**      | 27                             | 0                            | 13                                | 0                                   | 0.00%              | 13                                           | 0                                              | 0.00%                         | 0.00%                                    | 13                                           | 0                                              | 0.00%                         | 0.00%                                               | 1                                          | 0                   | 0.00%               | 0                    | 0                   | 0.00%               | 0                    | 0                   | 0.00%               | 13                                         | 0                   | 0.00%               | 0                                            | 0                   | 0.00%               | 0                                          | 0                   | 0.00%               | 13                                           | 0                   | 0.00%               |   |
| 981 K**      | 93                             | 7                            | 54                                | 7                                   | 8.54%              | 13                                           | 5                                              | 38.46%                        | 1.78%                                    | 13                                           | 5                                              | 38.46%                        | 1.78%                                               | 5                                          | 0                   | 0.00%               | 4                    | 2                   | 50.00%              | 4                    | 2                   | 50.00%              | 4                                          | 4                   | 100.00%             | 17                                           | 7                   | 41.18%              | 17                                         | 5                   | 29.41%              | 27                                           | 0                   | 0.00%               |   |
| 1001 K       | 119                            | 2                            | 76                                | 2                                   | 2.63%              | 36                                           | 0                                              | 0.00%                         | 0.00%                                    | 36                                           | 0                                              | 0.00%                         | 0.00%                                               | 7                                          | 0                   | 0.00%               | 3                    | 0                   | 0.00%               | 2                    | 0                   | 0.00%               | 49                                         | 2                   | 4.08%               | 7                                            | 0                   | 0.00%               | 24                                         | 0                   | 0.00%               | 25                                           | 0                   | 0.00%               |   |
| 1006 K**     | 54                             | 0                            | 48                                | 0                                   | 0.00%              | 4                                            | 0                                              | 0.00%                         | 0.00%                                    | 4                                            | 0                                              | 0.00%                         | 0.00%                                               | 2                                          | 0                   | 0.00%               | 2                    | 0                   | 0.00%               | 0                    | 0                   | 0.00%               | 0                                          | 0                   | 0.00%               | 0                                            | 0                   | 0.00%               | 16                                         | 0                   | 0.00%               | 4                                            | 0                   | 0.00%               |   |
| 1020 K**     | 62                             | 1                            | 28                                | 1                                   | 3.57%              | 26                                           | 0                                              | 0.00%                         | 0.00%                                    | 26                                           | 0                                              | 0.00%                         | 0.00%                                               | 8                                          | 0                   | 0.00%               | 2                    | 0                   | 0.00%               | 2                    | 0                   | 0.00%               | 9                                          | 0                   | 0.00%               | 4                                            | 0                   | 0.00%               | 17                                         | 1                   | 5.88%               | 22                                           | 0                   | 0.00%               |   |
| 1024 K       | 160                            | 0                            | 95                                | 0                                   | 0.00%              | 56                                           | 0                                              | 0.00%                         | 0.00%                                    | 56                                           | 0                                              | 0.00%                         | 0.00%                                               | 9                                          | 0                   | 0.00%               | 7                    | 0                   | 0.00%               | 2                    | 0                   | 0.00%               | 37                                         | 0                   | 0.00%               | 15                                           | 0                   | 0.00%               | 51                                         | 0                   | 0.00%               | 39                                           | 0                   | 0.00%               |   |
| 1045 K       | 169                            | 3                            | 99                                | 3                                   | 3.03%              | 61                                           | 0                                              | 0.00%                         | 0.00%                                    | 61                                           | 0                                              | 0.00%                         | 0.00%                                               | 9                                          | 0                   | 0.00%               | 9                    | 0                   | 0.00%               | 2                    | 0                   | 0.00%               | 41                                         | 2                   | 4.88%               | 19                                           | 4                   | 21.05%              | 49                                         | 1                   | 2.04%               | 40                                           | 0                   | 0.00%               |   |
| 1046 K**     | 122                            | 10                           | 73                                | 10                                  | 13.70%             | 45                                           | 0                                              | 0.00%                         | 0.00%                                    | 45                                           | 0                                              | 0.00%                         | 0.00%                                               | 4                                          | 0                   | 0.00%               | 7                    | 7                   | 100.00%             | 0                    | 0                   | 0.00%               | 29                                         | 2                   | 6.90%               | 9                                            | 0                   | 0.00%               | 37                                         | 1                   | 2.70%               | 36                                           | 0                   | 0.00%               |   |
| 1047 K**     | 127                            | 13                           | 76                                | 13                                  | 17.11%             | 49                                           | 0                                              | 0.00%                         | 0.00%                                    | 49                                           | 0                                              | 0.00%                         | 0.00%                                               | 2                                          | 0                   | 0.00%               | 8                    | 8                   | 100.00%             | 0                    | 0                   | 0.00%               | 32                                         | 3                   | 9.38%               | 11                                           | 0                   | 0.00%               | 36                                         | 2                   | 5.56%               | 38                                           | 0                   | 0.00%               |   |
| 1050 K       | 146                            | 0                            | 86                                | 0                                   | 0.00%              | 56                                           | 0                                              | 0.00%                         | 0.00%                                    | 56                                           | 0                                              | 0.00%                         | 0.00%                                               | 4                                          | 0                   | 0.00%               | 10                   | 0                   | 0.00%               | 1                    | 0                   | 0.00%               | 36                                         | 0                   | 0.00%               | 12                                           | 0                   | 0.00%               | 40                                         |                     |                     |                                              |                     |                     |   |

|      |     |     |    |    |    |         |       |     |    |         |       |                          |   |   |       |   |   |         |   |   |         |    |    |         |    |   |         |    |    |         |    |   |        |
|------|-----|-----|----|----|----|---------|-------|-----|----|---------|-------|--------------------------|---|---|-------|---|---|---------|---|---|---------|----|----|---------|----|---|---------|----|----|---------|----|---|--------|
| 1760 | K   | 52  | 36 | 36 | 32 | 88.89%  | 1.30% | 16  | 4  | 25.00%  | 1.17% |                          | 0 | 0 |       | 6 | 6 | 100.00% | 0 |   |         | 14 | 14 | 100.00% | 13 | 4 | 30.77%  | 16 | 12 | 75.00%  | 3  | 0 | 0.00%  |
| 1762 | K** | 36  | 33 | 32 | 29 | 90.63%  | 1.18% | 4   | 4  | 100.00% | 1.17% |                          | 0 | 0 |       | 6 | 6 | 100.00% | 0 |   |         | 14 | 12 | 85.71%  | 4  | 4 | 100.00% | 12 | 11 | 91.67%  | 0  | 0 |        |
| 1769 | K** | 72  | 72 | 62 | 62 | 100.00% | 2.51% | 10  | 10 | 100.00% | 2.93% |                          | 0 | 0 |       | 9 | 9 | 100.00% | 4 | 4 | 100.00% | 26 | 26 | 100.00% | 6  | 6 | 100.00% | 27 | 27 | 100.00% | 0  | 0 |        |
| 1772 | K** | 72  | 64 | 62 | 56 | 90.32%  | 2.27% | 10  | 8  | 80.00%  | 2.35% |                          | 0 | 0 |       | 9 | 7 | 77.78%  | 4 | 2 | 50.00%  | 26 | 24 | 92.31%  | 6  | 6 | 100.00% | 27 | 25 | 92.59%  | 0  | 0 |        |
| 1774 | K** | 2   | 2  | 2  | 2  | 100.00% | 0.68% | 0   | 0  | ND      | 0.00% | Complete Loss of peptide | 0 | 0 |       | 0 |   |         |   |   |         | 0  | 0  |         | 0  | 0 |         | 2  | 2  | 100.00% | 0  | 0 |        |
| 1783 | K   | 5   | 3  | 2  | 0  | 0.00%   | 0.00% | 3   | 3  | 100.00% | 0.88% |                          | 0 | 0 |       | 0 |   |         |   |   |         | 0  | 0  |         | 3  | 3 | 100.00% | 2  | 0  | 0.00%   | 0  | 0 |        |
| 1794 | K   | 43  | 13 | 18 | 7  | 38.89%  | 0.28% | 25  | 6  | 24.00%  | 1.76% |                          | 0 | 0 |       | 2 | 1 | 50.00%  | 0 |   |         | 4  | 1  | 25.00%  | 19 | 4 | 21.05%  | 12 | 5  | 41.67%  | 6  | 2 | 33.33% |
| 1800 | K** | 22  | 4  | 12 | 3  | 25.00%  | 0.12% | 10  | 1  | 10.00%  | 0.29% |                          | 0 | 0 |       | 1 |   | 0.00%   | 0 |   |         | 1  | 0  | 0.00%   | 5  | 1 | 20.00%  | 10 | 3  | 30.00%  | 5  | 0 | 0.00%  |
| 1810 | K   | 22  | 17 | 16 | 12 | 75.00%  | 0.49% | 6   | 5  | 83.33%  | 1.47% |                          | 0 | 0 |       | 0 |   |         |   |   |         | 3  | 2  | 66.67%  | 6  | 5 | 83.33%  | 13 | 10 | 76.92%  | 0  | 0 |        |
| 1812 | K** | 18  | 13 | 13 | 11 | 84.62%  | 0.45% | 5   | 2  | 40.00%  | 0.55% |                          | 0 | 0 |       | 0 |   |         |   |   |         | 3  | 2  | 66.67%  | 5  | 2 | 40.00%  | 10 | 9  | 90.00%  | 0  | 0 |        |
| 1900 | K   | ND  | ND | ND | ND | ND      | ND    | ND  | ND | ND      | ND    | ND                       | 0 | 0 |       | 0 |   |         |   |   |         | 0  | 0  |         | 0  | 0 |         | 0  | 0  | 0.00%   | 0  | 0 |        |
| 2042 | K   | 65  | 0  | 26 | 0  | 0.00%   | 0.00% | 38  | 0  | 0.00%   | 0.00% |                          | 1 | 0 | 0.00% | 0 |   |         |   |   |         | 8  | 0  | 0.00%   | 13 | 0 | 0.00%   | 18 | 0  | 0.00%   | 25 | 0 | 0.00%  |
| 2086 | K   | 157 | 5  | 27 | 5  | 18.52%  | 0.20% | 125 | 0  | 0.00%   | 0.00% |                          | 5 | 0 | 0.00% | 0 |   |         |   |   |         | 13 | 4  | 0.00%   | 33 | 0 | 0.00%   | 23 | 5  | 21.74%  | 79 | 0 | 0.00%  |
| 2091 | K   | 5   | 3  | 4  | 3  | 75.00%  | 0.12% | 1   | 0  | 0.00%   | 0.00% |                          | 0 | 0 |       | 0 |   |         |   |   |         | 0  | 0  |         | 0  | 0 |         | 4  | 3  | 75.00%  | 1  | 0 | 0.00%  |

\*\*Proximity to other tryptic residues may result in residue being missed in a trypsin digest if they are unmodified
