# Supplementary material
Source: PubMed Central journal article supplement (PMC2645867)
Supplement: NIHMS79169-supplement-03.pdf [file NIHMS79169-supplement-03.pdf]

|     |   |                     |       |                                                             |  |        |                                |   |    |  |
|-----|---|---------------------|-------|-------------------------------------------------------------|--|--------|--------------------------------|---|----|--|
| 373 | ^ | Acetylation/Methion | 42/16 | <b>TMKNVLN</b> HMTHCQSGK                                    |  | 3.7509 | HSp300 BAC Ac p3 Ti 111.006228 | 2 | 1  |  |
| 373 | ^ | Acetylation         | 42    | <b>TMKNVLN</b> HMTHCQSGKSCQVAHCASSR                         |  | 7.7423 | HSp300 BAC Ac p3 Ti 113.008738 | 2 | 9  |  |
| 373 | ^ | Acetylation/Methion | 42/16 | <b>TMKNVLN</b> HMTHCQSGKSCQVAHCASSR                         |  | 5.6013 | HSp300 BAC Ac p3 Ti 113.008217 | 3 | 5  |  |
| 373 | ^ | Acetylation/Methion | 42/16 | <b>TMKNVLN</b> HMTHCQSGKSCQVAHCASSR                         |  | 3.8745 | HSp300 BAC Ac p3 Ti 112.008058 | 3 | 1  |  |
| 373 | ^ | Acetylation/Methion | 42/16 | <b>TMKNVLN</b> HMTHCQSGKSCQVAHCASSR                         |  | 3.9859 | HSp300 BAC Ac p3 Ti 113.008036 | 4 | 1  |  |
| 373 | ^ | Acetylation         | 42    | <b>TMKNVLN</b> HMTHCQSGK                                    |  | 4.1942 | HSp300 BAC DeAc p3 Ti 101.0081 | 1 | 1  |  |
| 373 | ^ |                     | K     | ⊙ ^ ⊙ ^                                                     |  |        |                                |   |    |  |
| 386 | ^ | Acetylation         | 42    | <b>TMKNVLN</b> HMTHCQSGKSCQVAHCASSR                         |  | 6.8453 | HSp300 BAC Ac p2 Ti 114.008542 | 2 | 5  |  |
| 386 | ^ | Acetylation/Methion | 42/16 | <b>TMKNVLN</b> HMTHCQSGKSCQVAHCASSR                         |  | 6.058  | HSp300 BAC Ac p2 Ti 114.008092 | 3 | 2  |  |
| 386 | ^ | Acetylation/Methion | 42/16 | <b>TMKNVLN</b> HMTHCQSGKSCQVAHCASSR                         |  | 5.4066 | HSp300 BAC Ac p2 Ti 113.008060 | 3 | 2  |  |
| 386 | ^ | Acetylation         | 42    | <b>NVLN</b> HMTHCQSGKSCQVAHCASSR                            |  | 6.485  | HSp300 BAC Ac p2 Ti 113.007941 | 1 | 7  |  |
| 386 | ^ | Acetylation         | 42    | <b>TMKNVLN</b> HMTHCQSGKSCQVAHCASSR                         |  | 7.2385 | HSp300 BAC DeAc p2 Ti 112.0083 | 2 | 3  |  |
| 386 | ^ | Acetylation/Methion | 42/16 | <b>TMKNVLN</b> HMTHCQSGKSCQVAHCASSR                         |  | 6.2355 | HSp300 BAC DeAc p2 Ti 112.0078 | 3 | 2  |  |
| 386 | ^ | Acetylation         | 42    | <b>NVLN</b> HMTHCQSGKSCQVAHCASSR                            |  | 7.1877 | HSp300 BAC DeAc p2 Ti 112.0077 | 1 | 4  |  |
| 386 | ^ | Acetylation         | 42    | <b>NVLN</b> HMTHCQSGKSCQVAHCASSR                            |  | 4.8929 | HSp300 BAC DeAc p2 Ti 112.0077 | 1 | 4  |  |
| 386 | ^ | Acetylation         | 42    | <b>TMKNVLN</b> HMTHCQSGKSCQVAHCASSR                         |  | 7.7423 | HSp300 BAC Ac p3 Ti 113.008738 | 2 | 9  |  |
| 386 | ^ | Acetylation/Methion | 42/16 | <b>TMKNVLN</b> HMTHCQSGKSCQVAHCASSR                         |  | 5.6013 | HSp300 BAC Ac p3 Ti 113.008217 | 3 | 5  |  |
| 386 | ^ | Acetylation/Methion | 42/16 | <b>TMKNVLN</b> HMTHCQSGKSCQVAHCASSR                         |  | 3.8745 | HSp300 BAC Ac p3 Ti 112.008058 | 3 | 1  |  |
| 386 | ^ | Acetylation/Methion | 42/16 | <b>TMKNVLN</b> HMTHCQSGKSCQVAHCASSR                         |  | 3.9859 | HSp300 BAC Ac p3 Ti 113.008036 | 4 | 1  |  |
| 386 | ^ | Acetylation         | 42    | <b>NVLN</b> HMTHCQSGKSCQVAHCASSR                            |  | 6.9877 | HSp300 BAC Ac p3 Ti 112.008060 | 1 | 8  |  |
| 386 | ^ | Acetylation         | 42    | <b>NVLN</b> HMTHCQSGKSCQVAHCASSR                            |  | 4.7419 | HSp300 BAC Ac p3 Ti 113.008188 | 1 | 4  |  |
| 386 | ^ | Acetylation         | 42    | <b>NVLN</b> HMTHCQSGKSCQVAHCASSR                            |  | 5.0329 | HSp300 BAC DeAc p3 Ti 101.0074 | 1 | 1  |  |
| 386 | ^ |                     | K     | ⊙ ^ ⊙ ^                                                     |  |        |                                |   |    |  |
| 404 | ^ | Acetylation         | 42    | <b>QIISHW</b> KNCTR                                         |  | 2.995  | HSp300 BAC Ac p2 Ti 108.006406 | 1 | 2  |  |
| 404 | ^ | Acetylation         | 42    | <b>QIISHW</b> KNCTR                                         |  | 2.6238 | HSp300 BAC Ac p3 Ti 109.006758 | 1 | 2  |  |
| 404 | ^ |                     | K     | ⊙ ^                                                         |  |        |                                |   |    |  |
| 418 | ^ | Acetylation         | 42    | <b>HDCPVCLPL</b> KNAGDK                                     |  | 3.0909 | HsBAC p300 Ac p1 Ti 106.008520 | 1 | 1  |  |
| 418 | ^ | Acetylation         | 42    | <b>HDCPVCLPL</b> KNAGDKR                                    |  | 5.2018 | HsBAC p300 Ac p1 Ti 107.009201 | 2 | 3  |  |
| 418 | ^ | Acetylation         | 42    | <b>HDCPVCLPL</b> KNAGDKR                                    |  | 5.0888 | HSp300 BAC Ac p2 Ti 109.007271 | 2 | 7  |  |
| 418 | ^ | Acetylation         | 42    | <b>HDCPVCLPL</b> KNAGDK                                     |  | 3.9965 | HSp300 BAC DeAc p2 Ti 104.0064 | 1 | 1  |  |
| 418 | ^ | Acetylation         | 42    | <b>HDCPVCLPL</b> KNAGDK                                     |  | 3.5102 | HSp300 BAC DeAc p2 Ti 104.0064 | 1 | 1  |  |
| 418 | ^ | Acetylation         | 42    | <b>HDCPVCLPL</b> KNAGDKR                                    |  | 5.1197 | HSp300 BAC DeAc p2 Ti 105.0069 | 2 | 4  |  |
| 418 | ^ | Acetylation         | 42    | <b>HDCPVCLPL</b> KNAGDK                                     |  | 3.6973 | HSp300 BAC Ac p3 Ti 103.007224 | 1 | 2  |  |
| 418 | ^ | Acetylation         | 42    | <b>HDCPVCLPL</b> KNAGDKR                                    |  | 5.5702 | HSp300 BAC Ac p3 Ti 103.007563 | 2 | 15 |  |
| 418 | ^ | Acetylation         | 42    | <b>KNAGDKRN</b> QQPILTGAPVGL                                |  | 5.1274 | HSp300 BAC Ac p2 CTi 107.00803 | 2 | 2  |  |
| 418 | ^ | Acetylation         | 42    | <b>KNAGDKRN</b> QQPILTGAPVGLGNPSSL                          |  | 4.3298 | HSp300 BAC Ac p2 CTi 109.00873 | 2 | 1  |  |
| 418 | ^ | Acetylation         | 42    | <b>KNAGDKRN</b> QQPILTGAPVGLGNPSSLGVGQQSAPNLSTVSVQIDPSSIERY |  | 4.4003 | HSp300 BAC Ac p2 CTi 112.01008 | 2 | 3  |  |
| 418 | ^ | Acetylation         | 42    | <b>KNAGDKRN</b> QQPILTGAPVGL                                |  | 3.5672 | HSp300 BAC Ac p3 CTi 106.00746 | 1 | 1  |  |
| 418 | ^ | Acetylation         | 42    | <b>KNAGDKRN</b> QQPILTGAPVGL                                |  | 3.7285 | HSp300 BAC Ac p3 CTi 104.00810 | 2 | 2  |  |
| 418 | ^ | Acetylation         | 42    | <b>KNAGDKRN</b> QQPILTGAPVGLGNPSSLGVGQQSAPNLSTVSVQIDPSSIERY |  | 4.2936 | HSp300 BAC Ac p3 CTi 110.01005 | 2 | 2  |  |
| 418 | ^ | Acetylation         | 42    | <b>KNAGDKRN</b> QQPILTGAPVGL                                |  | 3.5144 | HSp300 BAC DeAc p3 CTi 104.007 | 1 | 2  |  |
| 418 | ^ |                     | K     | ⊙ ^                                                         |  |        |                                |   |    |  |
| 423 | ^ | Acetylation         | 42    | <b>HDCPVCLPL</b> KNAGDKR                                    |  | 5.2018 | HsBAC p300 Ac p1 Ti 107.009201 | 2 | 3  |  |
| 423 | ^ | Acetylation         | 42    | <b>HDCPVCLPL</b> KNAGDKR                                    |  | 5.0888 | HSp300 BAC Ac p2 Ti 109.007271 | 2 | 7  |  |
| 423 | ^ | Acetylation         | 42    | <b>HDCPVCLPL</b> KNAGDKR                                    |  | 5.1197 | HSp300 BAC DeAc p2 Ti 105.0069 | 2 | 4  |  |
| 423 | ^ | Acetylation         | 42    | <b>HDCPVCLPL</b> KNAGDKR                                    |  | 5.5702 | HSp300 BAC Ac p3 Ti 103.007563 | 2 | 15 |  |
| 423 | ^ | Acetylation         | 42    | <b>KNAGDKRN</b> QQPILTGAPVGL                                |  | 3.9128 | HSp300 BAC Ac p2 CTi 111.00752 | 1 | 1  |  |
| 423 | ^ | Acetylation         | 42    | <b>KNAGDKRN</b> QQPILTGAPVGL                                |  | 5.1274 | HSp300 BAC Ac p2 CTi 107.00803 | 2 | 2  |  |
| 423 | ^ | Acetylation         | 42    | <b>KNAGDKRN</b> QQPILTGAPVGLGNPSSL                          |  | 4.0654 | HSp300 BAC Ac p2 CTi 112.00886 | 1 | 1  |  |
| 423 | ^ | Acetylation         | 42    | <b>KNAGDKRN</b> QQPILTGAPVGLGNPSSL                          |  | 4.3298 | HSp300 BAC Ac p2 CTi 109.00873 | 2 | 1  |  |
| 423 | ^ | Acetylation         | 42    | <b>KNAGDKRN</b> QQPILTGAPVGLGNPSSLGVGQQSAPNLSTVSVQIDPSSIERY |  | 4.4003 | HSp300 BAC Ac p2 CTi 112.01008 | 2 | 3  |  |
| 423 | ^ | Acetylation         | 42    | <b>KNAGDKRN</b> QQPILTGAPVGL                                |  | 3.5963 | HSp300 BAC Ac p3 CTi 108.00761 | 1 | 2  |  |
| 423 | ^ | Acetylation         | 42    | <b>KNAGDKRN</b> QQPILTGAPVGL                                |  | 3.7285 | HSp300 BAC Ac p3 CTi 104.00810 | 2 | 2  |  |
| 423 | ^ | Acetylation         | 42    | <b>KNAGDKRN</b> QQPILTGAPVGLGNPSSL                          |  | 3.9418 | HSp300 BAC Ac p3 CTi 109.00827 | 1 | 1  |  |
| 423 | ^ | Acetylation         | 42    | <b>KNAGDKRN</b> QQPILTGAPVGLGNPSSLGVGQQSAPNLSTVSVQIDPSSIERY |  | 4.2936 | HSp300 BAC Ac p3 CTi 110.01005 | 2 | 2  |  |
| 423 | ^ |                     | K     | ⊙ ^                                                         |  |        |                                |   |    |  |

|      |   |             |    |                                                                             |        |                                |   |    |
|------|---|-------------|----|-----------------------------------------------------------------------------|--------|--------------------------------|---|----|
| 489  | ^ | Acetylation | 42 | A Y A A L G L P Y Q V N Q M P T Q P Q V Q A K N Q Q N Q Q P G Q S P Q G M R | 4.0187 | HsBAC p300 Ac p1 Ti 111.015098 | 1 | 1  |
| 489  | ^ | Acetylation | 42 | A Y A A L G L P Y Q V N Q M P T Q P Q V Q A K N Q Q N Q Q P G Q S P Q G M R | 4.2864 | HSp300 BAC Ac p3 Ti 110.009446 | 1 | 1  |
| 489  | ^ |             | K  | △                                                                           |        |                                |   |    |
| 569  | ^ | Acetylation | 42 | K Q W H E D I T Q D L R                                                     | 3.5031 | HSp300 BAC Ac p2 Ti 104.007617 | 1 | 3  |
| 569  | ^ | Acetylation | 42 | K Q W H E D I T Q D L R                                                     | 4.6197 | HSp300 BAC Ac p3 Ti 101.009140 | 1 | 5  |
| 569  | ^ |             | K  | △                                                                           |        |                                |   |    |
| 601  | ^ | Acetylation | 42 | L V Q A I F P T P D P A A L K D R                                           | 3.6344 | HsBAC p300 Ac p1 Ti 105.012482 | 1 | 1  |
| 601  | ^ | Acetylation | 42 | L V Q A I F P T P D P A A L K D R                                           | 5.4857 | HsBAC p300 Ac p1 Ti 106.012176 | 1 | 9  |
| 601  | ^ | Acetylation | 42 | L V Q A I F P T P D P A A L K D R                                           | 4.6033 | HSp300 BAC Ac p2 Ti 106.009860 | 1 | 9  |
| 601  | ^ | Acetylation | 42 | L V Q A I F P T P D P A A L K D R                                           | 4.6829 | HSp300 BAC Ac p3 Ti 109.010266 | 1 | 15 |
| 601  | ^ | Acetylation | 42 | L V Q A I F P T P D P A A L K D R                                           | 3.7571 | HSp300 BAC Ac p3 Ti 102.009772 | 1 | 1  |
| 601  | ^ |             | K  | △                                                                           |        |                                |   |    |
| 614  | ^ | Acetylation | 42 | K V E G D M Y E S A N N R                                                   | 2.5578 | HSp300 BAC Ac p2 Ti 101.005796 | 1 | 1  |
| 614  | ^ | Acetylation | 42 | K V E G D M Y E S A N N R                                                   | 3.3191 | HSp300 BAC DeAc p2 Ti 102.0046 | 1 | 5  |
| 614  | ^ | Acetylation | 42 | K V E G D M Y E S A N N R                                                   | 3.0881 | HSp300 BAC Ac p3 Ti 102.005676 | 1 | 2  |
| 614  | ^ | Acetylation | 42 | N L V A Y A R K V E                                                         | 3.0832 | HSp300 BAC Ac Ec 101.008883.00 | 1 | 1  |
| 614  | ^ | Acetylation | 42 | N L V A Y A R K V E G D M Y E S A N N R A E                                 | 4.8811 | HSp300 BAC Ac Ec 102.010242.01 | 1 | 1  |
| 614  | ^ |             | K  | △                                                                           |        |                                |   |    |
| 636  | ^ | Acetylation | 42 | A E Y Y H L L A E K I Y K                                                   | 3.1367 | HsBAC p300 SIRT p1 Ti 105.0104 | 1 | 1  |
| 636  | ^ |             | K  | △                                                                           |        |                                |   |    |
| 970  | ^ | Acetylation | 42 | K Q P S Q E V K M E A K M E                                                 | 2.9089 | HSp300 BAC Ac Ec 102.005727.00 | 1 | 2  |
| 970  | ^ |             | K  | △                                                                           |        |                                |   |    |
| 981  | ^ | Acetylation | 42 | M E A K M E V D Q P E P A D T Q P E D I S E S K                             | 4.1742 | HsBAC p300 SIRT p1 Ti 102.0079 | 1 | 2  |
| 981  | ^ | Acetylation | 42 | M E A K M E V D Q P E P A D T Q P E D I S E S K                             | 5.1268 | HSp300 BAC DeAc p2 Ti 102.0061 | 1 | 4  |
| 981  | ^ | Acetylation | 42 | M E A K M E V D Q P E P A D T Q P E D I S E S K                             | 4.2959 | HSp300 BAC Ac p3 Ti 101.008898 | 1 | 1  |
| 981  | ^ |             | K  | △                                                                           |        |                                |   |    |
| 1001 | ^ | Acetylation | 42 | M E V D Q P E P A D T Q P E D I S E S K V E D C K                           | 4.453  | HSp300 BAC Ac p2 Ti 101.008256 | 1 | 1  |
| 1001 | ^ | Acetylation | 42 | A K M E V D Q P E P A D T Q P E D I S E S K V E D C K M E                   | 4.597  | HSp300 BAC Ac Ec 101.008850.00 | 1 | 1  |
| 1001 | ^ |             | K  | △                                                                           |        |                                |   |    |
| 1020 | ^ | Acetylation | 42 | S T E L K T E I K E E E D Q P S T S A T Q S S P A P G Q S K                 | 4.9049 | HSp300 BAC Ac p3 Ti 101.008531 | 1 | 1  |
| 1020 | ^ |             | K  | △                                                                           |        |                                |   |    |
| 1045 | ^ | Acetylation | 42 | T E I K E E E D Q P S T S A T Q S S P A P G Q S K K K                       | 4.4992 | HSp300 BAC Ac p3 Ti 101.006450 | 2 | 1  |
| 1045 | ^ | Acetylation | 42 | I K E E E D Q P S T S A T Q S S P A P G Q S K K K I F K P E E               | 6.729  | HSp300 BAC Ac Ec 102.006861.00 | 3 | 2  |
| 1045 | ^ |             | K  | △ △ △                                                                       |        |                                |   |    |
| 1046 | ^ | Acetylation | 42 | T E I K E E E D Q P S T S A T Q S S P A P G Q S K K I F K P E E L R         | 3.2639 | HsBAC p300 Ac p1 Ti 108.008714 | 2 | 7  |
| 1046 | ^ | Acetylation | 42 | T E I K E E E D Q P S T S A T Q S S P A P G Q S K K K                       | 4.4992 | HSp300 BAC Ac p3 Ti 101.006450 | 2 | 1  |
| 1046 | ^ | Acetylation | 42 | I K E E E D Q P S T S A T Q S S P A P G Q S K K K I F K P E E               | 6.729  | HSp300 BAC Ac Ec 102.006861.00 | 3 | 2  |
| 1046 | ^ |             | K  | △ △ △                                                                       |        |                                |   |    |
| 1047 | ^ | Acetylation | 42 | K K I F K P E E L R                                                         | 3.2639 | HsBAC p300 Ac p1 Ti 108.008714 | 2 | 7  |
| 1047 | ^ | Acetylation | 42 | K I F K P E E L R                                                           | 2.6715 | HsBAC p300 Ac p1 Ti 107.008346 | 1 | 1  |
| 1047 | ^ | Acetylation | 42 | K I F K P E E L R                                                           | 2.5886 | HSp300 BAC Ac p2 Ti 106.006882 | 1 | 1  |
| 1047 | ^ | Acetylation | 42 | K K I F K P E E L R                                                         | 2.6433 | HSp300 BAC Ac p3 Ti 111.006837 | 1 | 1  |



|      |   |             |    |                                                                                                                                                                                          |        |                                |   |    |
|------|---|-------------|----|------------------------------------------------------------------------------------------------------------------------------------------------------------------------------------------|--------|--------------------------------|---|----|
| 1203 | ^ | Acetylation | 42 | HFC <b>E</b> KCFNEIQGESVSLGDDPSQPQT <b>T</b> INKEQ <b>F</b>                                                                                                                              | 5.6682 | HSp300 BAC Ac p3 CTi 102.00866 | 1 | 8  |
| 1203 | ^ | Acetylation | 42 | HFC <b>E</b> KCFNEIQGESVSLGDDPSQPQT <b>T</b> INKEQ <b>F</b>                                                                                                                              | 6.0937 | HSp300 BAC DeAc p3 CTi 102.008 | 1 | 3  |
| 1203 | ^ |             | K  | <b>A</b>                                                                                                                                                                                 |        |                                |   |    |
| 1228 | ^ | Acetylation | 42 | YHFC <b>E</b> KCFNEIQGESVSLGDDPSQPQT <b>T</b> INKEQ <b>F</b> SK                                                                                                                          | 4.338  | HsBAC p300 Ac p1 Ti 104.012112 | 2 | 1  |
| 1228 | ^ |             | K  | <b>A</b>                                                                                                                                                                                 |        |                                |   |    |
| 1331 | ^ | Acetylation | 42 | VVHASD <b>K</b> TVEVK <b>P</b> GM <b>K</b>                                                                                                                                               | 3.7268 | HsBAC p300 SIRT p1 Ti 107.0068 | 1 | 1  |
| 1331 | ^ |             | K  | <b>A</b>                                                                                                                                                                                 |        |                                |   |    |
| 1336 | ^ | Acetylation | 42 | TVEV <b>K</b> PGM <b>K</b> AR                                                                                                                                                            | 2.9557 | HSp300 BAC Ac p3 Ti 102.006222 | 2 | 1  |
| 1336 | ^ |             | K  | <b>A</b>                                                                                                                                                                                 |        |                                |   |    |
| 1340 | ^ | Acetylation | 42 | TVEV <b>K</b> PGM <b>K</b> AR                                                                                                                                                            | 3.0416 | HsBAC p300 Ac p1 Ti 105.006924 | 1 | 4  |
| 1340 | ^ | Acetylation | 42 | TVEV <b>K</b> PGM <b>K</b> AR                                                                                                                                                            | 2.8958 | HSp300 BAC Ac p2 Ti 106.005265 | 1 | 2  |
| 1340 | ^ | Acetylation | 42 | TVEV <b>K</b> PGM <b>K</b> AR                                                                                                                                                            | 2.9357 | HSp300 BAC DeAc p2 Ti 104.0049 | 1 | 1  |
| 1340 | ^ | Acetylation | 42 | TVEV <b>K</b> PGM <b>K</b> AR                                                                                                                                                            | 3.1739 | HSp300 BAC Ac p3 Ti 106.005662 | 1 | 3  |
| 1340 | ^ | Acetylation | 42 | TVEV <b>K</b> PGM <b>K</b> AR                                                                                                                                                            | 2.9557 | HSp300 BAC Ac p3 Ti 102.006222 | 2 | 1  |
| 1340 | ^ | Acetylation | 42 | V <b>K</b> PGM <b>K</b> ARFVDSGEMAE                                                                                                                                                      | 2.9257 | HSp300 BAC Ac Ec 109.006953.00 | 1 | 2  |
| 1340 | ^ | Acetylation | 42 | V <b>K</b> PGM <b>K</b> ARFVDSGEMAE                                                                                                                                                      | 2.7282 | HSp300 BAC p3 DeAc Ec 106.0068 | 1 | 2  |
| 1340 | ^ |             | K  | <b>A</b>                                                                                                                                                                                 |        |                                |   |    |
| 1427 | ^ | Acetylation | 42 | K <b>L</b> GYTTGHIWACPPSEGGDDYIFHCHPPD <b>Q</b> K                                                                                                                                        | 3.5668 | HSp300 BAC DeAc p2 Ti 110.0089 | 1 | 1  |
| 1427 | ^ |             | K  | <b>A</b>                                                                                                                                                                                 |        |                                |   |    |
| 1499 | ^ | Acetylation | 42 | QATEDR <b>L</b> TS <b>A</b> KELPYFEGDFWPNVLEES <b>I</b> K                                                                                                                                | 4.4952 | HsBAC p300 p1 NOMO Ti 103.0167 | 1 | 2  |
| 1499 | ^ | Acetylation | 42 | L <b>T</b> SA <b>K</b> ELPYFEGDFWPNVLEES <b>I</b> K                                                                                                                                      | 5.0205 | HsBAC p300 p1 NOMO Ti 101a.016 | 1 | 11 |
| 1499 | ^ | Acetylation | 42 | L <b>T</b> SA <b>K</b> ELPYFEGDFWPNVLEES <b>I</b> KELE <b>Q</b> EEEEER                                                                                                                   | 6.4098 | HsBAC p300 p1 NOMO Ti 105.0205 | 1 | 15 |
| 1499 | ^ | Acetylation | 42 | L <b>T</b> SA <b>K</b> ELPYFEGDFWPNVLEES <b>I</b> KELE <b>Q</b> EEEEER                                                                                                                   | 4.1967 | HsBAC p300 p1 NOMO Ti 104.0214 | 2 | 3  |
| 1499 | ^ | Acetylation | 42 | L <b>T</b> SA <b>K</b> ELPYFEGDFWPNVLEES <b>I</b> K                                                                                                                                      | 5.5063 | HsBAC p300 Ac p1 Ti 108.018206 | 1 | 8  |
| 1499 | ^ | Acetylation | 42 | L <b>T</b> SA <b>K</b> ELPYFEGDFWPNVLEES <b>I</b> K                                                                                                                                      | 5.3692 | HsBAC p300 Ac p1 Ti 105.018278 | 1 | 27 |
| 1499 | ^ | Acetylation | 42 | L <b>T</b> SA <b>K</b> ELPYFEGDFWPNVLEES <b>I</b> KELE <b>Q</b> EEEEER                                                                                                                   | 5.8169 | HsBAC p300 Ac p1 Ti 110.000353 | 1 | 16 |
| 1499 | ^ | Acetylation | 42 | L <b>T</b> SA <b>K</b> ELPYFEGDFWPNVLEES <b>I</b> K                                                                                                                                      | 5.3144 | HsBAC p300 SIRT p1 Ti 102.0171 | 1 | 10 |
| 1499 | ^ | Acetylation | 42 | L <b>T</b> SA <b>K</b> ELPYFEGDFWPNVLEES <b>I</b> K                                                                                                                                      | 5.2172 | HsBAC p300 SIRT p1 Ti 104.0171 | 1 | 1  |
| 1499 | ^ | Acetylation | 42 | L <b>T</b> SA <b>K</b> ELPYFEGDFWPNVLEES <b>I</b> KELE <b>Q</b> EEEEER                                                                                                                   | 5.4852 | HsBAC p300 SIRT p1 Ti 105.0201 | 1 | 5  |
| 1499 | ^ | Acetylation | 42 | L <b>T</b> SA <b>K</b> ELPYFEGDFWPNVLEES <b>I</b> KELE <b>Q</b> EEEEER                                                                                                                   | 4.0246 | HsBAC p300 SIRT p1 Ti 105.0002 | 2 | 1  |
| 1499 | ^ | Acetylation | 42 | L <b>T</b> SA <b>K</b> ELPYFEGDFWPNVLEES <b>I</b> K                                                                                                                                      | 5.1668 | HSp300 BAC Ac p2 Ti 105.013665 | 1 | 17 |
| 1499 | ^ | Acetylation | 42 | L <b>T</b> SA <b>K</b> ELPYFEGDFWPNVLEES <b>I</b> K                                                                                                                                      | 5.884  | HSp300 BAC Ac p2 Ti 106.013810 | 1 | 11 |
| 1499 | ^ | Acetylation | 42 | L <b>T</b> SA <b>K</b> ELPYFEGDFWPNVLEES <b>I</b> KELE <b>Q</b> EEEEER                                                                                                                   | 5.0911 | HSp300 BAC Ac p2 Ti 113.013263 | 1 | 7  |
| 1499 | ^ | Acetylation | 42 | L <b>T</b> SA <b>K</b> ELPYFEGDFWPNVLEES <b>I</b> K                                                                                                                                      | 4.1556 | HSp300 BAC DeAc p2 Ti 103.0130 | 1 | 3  |
| 1499 | ^ | Acetylation | 42 | L <b>T</b> SA <b>K</b> ELPYFEGDFWPNVLEES <b>I</b> K                                                                                                                                      | 4.5851 | HSp300 BAC Ac p3 Ti 104.014031 | 1 | 4  |
| 1499 | ^ | Acetylation | 42 | L <b>T</b> SA <b>K</b> ELPYFEGDFWPNVLEES <b>I</b> K                                                                                                                                      | 5.3065 | HSp300 BAC Ac p3 Ti 107.014164 | 1 | 28 |
| 1499 | ^ | Acetylation | 42 | L <b>T</b> SA <b>K</b> ELPYFEGDFWPNVLEES <b>I</b> KELE <b>Q</b> EEEEER                                                                                                                   | 5.5599 | HSp300 BAC Ac p3 Ti 104.015941 | 1 | 10 |
| 1499 | ^ | Acetylation | 42 | L <b>T</b> SA <b>K</b> ELPYFEGDFWPNVLEES <b>I</b> K                                                                                                                                      | 4.8058 | HSp300 BAC DeAc p3 Ti 101.0146 | 1 | 2  |
| 1499 | ^ | Acetylation | 42 | D <b>R</b> L <b>T</b> SA <b>K</b> ELPYF <b>E</b>                                                                                                                                         | 3.2457 | HsBAC p300 p1 NOMO Ec 105.0154 | 1 | 6  |
| 1499 | ^ | Acetylation | 42 | R <b>I</b> VH <b>D</b> Y <b>K</b> D <b>I</b> FK <b>Q</b> AT <b>E</b> D <b>R</b> L <b>T</b> SA <b>K</b> ELPY <b>F</b> E                                                                   | 3.7467 | HSp300 BAC Ac Ec 111.010674.01 | 1 | 2  |
| 1499 | ^ | Acetylation | 42 | R <b>I</b> VH <b>D</b> Y <b>K</b> D <b>I</b> FK <b>Q</b> AT <b>E</b> D <b>R</b> L <b>T</b> SA <b>K</b> ELPY <b>F</b> E                                                                   | 5.3961 | HSp300 BAC p2 DeAc Ec 108.0092 | 1 | 8  |
| 1499 | ^ | Acetylation | 42 | R <b>I</b> VH <b>D</b> Y <b>K</b> D <b>I</b> FK <b>Q</b> AT <b>E</b> D <b>R</b> L <b>T</b> SA <b>K</b> E                                                                                 | 6.1924 | HSp300 BAC p3 Ac Ec 109.007950 | 1 | 2  |
| 1499 | ^ | Acetylation | 42 | R <b>I</b> VH <b>D</b> Y <b>K</b> D <b>I</b> FK <b>Q</b> AT <b>E</b> D <b>R</b> L <b>T</b> SA <b>K</b> ELPY <b>F</b> E                                                                   | 3.9998 | HSp300 BAC p3 Ac Ec 109.010806 | 1 | 1  |
| 1499 | ^ | Acetylation | 42 | D <b>R</b> L <b>T</b> SA <b>K</b> ELPY <b>F</b> E                                                                                                                                        | 2.9747 | HSp300 BAC p3 Ac Ec 109.008808 | 1 | 1  |
| 1499 | ^ | Acetylation | 42 | W <b>Y</b> KK <b>M</b> L <b>D</b> K <b>A</b> V <b>S</b> E <b>R</b> I <b>V</b> H <b>D</b> Y <b>K</b> D <b>I</b> FK <b>Q</b> AT <b>E</b> D <b>R</b> L <b>T</b> SA <b>K</b> ELPY <b>F</b> E | 4.595  | HSp300 BAC p3 DeAc Ec 111.0112 | 1 | 3  |
| 1499 | ^ | Acetylation | 42 | R <b>I</b> VH <b>D</b> Y <b>K</b> D <b>I</b> FK <b>Q</b> AT <b>E</b> D <b>R</b> L <b>T</b> SA <b>K</b> ELPY <b>F</b> E                                                                   | 4.6363 | HSp300 BAC p3 DeAc Ec 109.0103 | 1 | 4  |
| 1499 | ^ | Acetylation | 42 | K <b>Q</b> AT <b>E</b> D <b>R</b> L <b>T</b> SA <b>K</b> ELPY <b>F</b> EG <b>D</b> F <b>W</b> P <b>N</b>                                                                                 | 3.8829 | HSp300 BAC Ac p2 CTi 105.01079 | 1 | 1  |
| 1499 | ^ | Acetylation | 42 | K <b>Q</b> AT <b>E</b> D <b>R</b> L <b>T</b> SA <b>K</b> ELPY <b>F</b> EG <b>D</b> F <b>W</b> P <b>N</b> L                                                                               | 3.6559 | HSp300 BAC Ac p2 CTi 105.01232 | 1 | 1  |
| 1499 | ^ | Acetylation | 42 | K <b>Q</b> AT <b>E</b> D <b>R</b> L <b>T</b> SA <b>K</b> EL <b>P</b> Y                                                                                                                   | 3.3535 | HSp300 BAC DeAc p2 CTi 103.006 | 1 | 2  |
| 1499 | ^ | Acetylation | 42 | K <b>Q</b> AT <b>E</b> D <b>R</b> L <b>T</b> SA <b>K</b> EL <b>P</b> Y                                                                                                                   | 2.6359 | HSp300 BAC Ac p3 CTi 101.00730 | 1 | 2  |
| 1499 | ^ | Acetylation | 42 | K <b>Q</b> AT <b>E</b> D <b>R</b> L <b>T</b> SA <b>K</b> ELPY <b>F</b> EG <b>D</b> F <b>W</b> P <b>N</b>                                                                                 | 3.8101 | HSp300 BAC DeAc p3 CTi 101.012 | 1 | 2  |
| 1499 | ^ | Acetylation | 42 | K <b>Q</b> AT <b>E</b> D <b>R</b> L <b>T</b> SA <b>K</b> ELPY <b>F</b> EG <b>D</b> F <b>W</b> P <b>N</b> L                                                                               | 4.0138 | HSp300 BAC DeAc p3 CTi 102.012 | 1 | 1  |



|      |   |             |    |                                    |        |                                |   |    |
|------|---|-------------|----|------------------------------------|--------|--------------------------------|---|----|
| 1546 | ^ | Acetylation | 42 | KREENTSNESTDVTKGDSKNAKKK           | 7.268  | HSp300 BAC Ac p3 Ti 103.006267 | 4 | 32 |
| 1546 | ^ | Acetylation | 42 | KREENTSNESTDVTKGDSKNAKKK           | 4.669  | HSp300 BAC Ac p3 Ti 101.006408 | 4 | 3  |
| 1546 | ^ | Acetylation | 42 | E Q E E E E R KREENTSNESTDVTKGDSKN | 3.6627 | HSp300 BAC DeAc p3 CTI 101.004 | 1 | 1  |
| 1546 | ^ |             | K  | ^ ^ ^ ^ ^                          |        |                                |   |    |
| 1549 | ^ | Acetylation | 42 | KREENTSNESTDVTKGDSKNAKKK           | 5.22   | HsBAC p300 Ac p1 Ti 105.007206 | 3 | 1  |
| 1549 | ^ | Acetylation | 42 | KREENTSNESTDVTKGDSKNAKKK           | 3.781  | HsBAC p300 Ac p1 Ti 108.008802 | 3 | 1  |
| 1549 | ^ | Acetylation | 42 | KREENTSNESTDVTKGDSKNAKKK           | 6.815  | HsBAC p300 Ac p1 Ti 105.008175 | 4 | 31 |
| 1549 | ^ | Acetylation | 42 | KREENTSNESTDVTKGDSKNAKKK           | 4.1885 | HsBAC p300 Ac p1 Ti 105.009648 | 4 | 5  |
| 1549 | ^ | Acetylation | 42 | KREENTSNESTDVTKGDSKNAKKKNNK        | 5.6146 | HsBAC p300 Ac p1 Ti 106.007151 | 5 | 4  |
| 1549 | ^ | Acetylation | 42 | E E E NTSNESTDVTKGDSKNAKKK         | 4.0139 | HsBAC p300 Ac p1 Ti 102.006503 | 3 | 1  |
| 1549 | ^ | Acetylation | 42 | N A K K K N N K K T S K N K        | 5.0109 | HsBAC p300 Ac p1 Ti 108.006598 | 6 | 6  |
| 1549 | ^ | Acetylation | 42 | KREENTSNESTDVTKGDSKNAKKK           | 5.2034 | HSp300 BAC Ac p2 Ti 105.004247 | 3 | 4  |
| 1549 | ^ | Acetylation | 42 | KREENTSNESTDVTKGDSKNAKKK           | 6.745  | HSp300 BAC Ac p2 Ti 106.005153 | 4 | 16 |
| 1549 | ^ | Acetylation | 42 | KREENTSNESTDVTKGDSKNAKKKNNK        | 4.3212 | HSp300 BAC Ac p2 Ti 103.005160 | 6 | 1  |
| 1549 | ^ | Acetylation | 42 | N A K K K N N K K T S K            | 3.2284 | HSp300 BAC Ac p2 Ti 105.004578 | 5 | 4  |
| 1549 | ^ | Acetylation | 42 | N A K K K N N K K T S K N K        | 5.0177 | HSp300 BAC Ac p2 Ti 107.004983 | 6 | 6  |
| 1549 | ^ | Acetylation | 42 | KREENTSNESTDVTKGDSKNAKKK           | 5.2444 | HSp300 BAC Ac p3 Ti 101.006082 | 3 | 4  |
| 1549 | ^ | Acetylation | 42 | KREENTSNESTDVTKGDSKNAKKK           | 4.9521 | HSp300 BAC Ac p3 Ti 105.009257 | 3 | 3  |
| 1549 | ^ | Acetylation | 42 | KREENTSNESTDVTKGDSKNAKKK           | 5.7153 | HSp300 BAC Ac p3 Ti 105.010817 | 3 | 4  |
| 1549 | ^ | Acetylation | 42 | KREENTSNESTDVTKGDSKNAKKK           | 7.268  | HSp300 BAC Ac p3 Ti 103.006267 | 4 | 32 |
| 1549 | ^ | Acetylation | 42 | KREENTSNESTDVTKGDSKNAKKK           | 4.669  | HSp300 BAC Ac p3 Ti 101.006408 | 4 | 3  |
| 1549 | ^ | Acetylation | 42 | N A K K K N N K K T S K N K        | 4.5164 | HSp300 BAC Ac p3 Ti 107.005380 | 6 | 1  |
| 1549 | ^ | Acetylation | 42 | A K K K N N K K T S K N K          | 3.3483 | HSp300 BAC Ac p2 CTI 110.00392 | 5 | 5  |
| 1549 | ^ | Acetylation | 42 | A K K K N N K K T S K N K S S L    | 3.9486 | HSp300 BAC Ac p2 CTI 111.00553 | 6 | 4  |
| 1549 | ^ | Acetylation | 42 | A K K K N N K K T S K N K          | 3.1984 | HSp300 BAC Ac p3 CTI 110.00144 | 4 | 1  |
| 1549 | ^ | Acetylation | 42 | A K K K N N K K T S K N K          | 3.5911 | HSp300 BAC Ac p3 CTI 105.00434 | 5 | 3  |
| 1549 | ^ | Acetylation | 42 | A K K K N N K K T S K N K S S L    | 4.1891 | HSp300 BAC Ac p3 CTI 109.00496 | 5 | 1  |
| 1549 | ^ | Acetylation | 42 | A K K K N N K K T S K N K S S L    | 4.0104 | HSp300 BAC Ac p3 CTI 109.00492 | 5 | 1  |
| 1549 | ^ | Acetylation | 42 | A K K K N N K K T S K N K S S L    | 3.6245 | HSp300 BAC Ac p3 CTI 108.00555 | 6 | 2  |
| 1549 | ^ | Acetylation | 42 | K K K N N K K T S K N K S S L      | 4.0467 | HSp300 BAC Ac p3 CTI 108.00554 | 6 | 1  |
| 1549 | ^ |             | K  | ^ ^ ^ ^ ^                          |        |                                |   |    |
| 1550 | ^ | Acetylation | 42 | KREENTSNESTDVTKGDSKNAKKK           | 6.815  | HsBAC p300 Ac p1 Ti 105.008175 | 4 | 31 |
| 1550 | ^ | Acetylation | 42 | KREENTSNESTDVTKGDSKNAKKK           | 4.1885 | HsBAC p300 Ac p1 Ti 105.009648 | 4 | 5  |
| 1550 | ^ | Acetylation | 42 | KREENTSNESTDVTKGDSKNAKKKNNK        | 5.6146 | HsBAC p300 Ac p1 Ti 106.007151 | 5 | 4  |
| 1550 | ^ | Acetylation | 42 | N A K K K N N K K T S K N K        | 5.0109 | HsBAC p300 Ac p1 Ti 108.006598 | 6 | 6  |
| 1550 | ^ | Acetylation | 42 | K K N N K K T S K N K              | 4.2243 | HsBAC p300 Ac p1 Ti 109.006194 | 5 | 9  |
| 1550 | ^ | Acetylation | 42 | K K N N K K T S K N K S S L S R    | 5.2262 | HsBAC p300 Ac p1 Ti 110.007799 | 6 | 1  |
| 1550 | ^ | Acetylation | 42 | K K N N K K T S K N K S S L S R    | 6.3155 | HsBAC p300 Ac p1 Ti 109.007298 | 6 | 10 |
| 1550 | ^ | Acetylation | 42 | KREENTSNESTDVTKGDSKNAKKK           | 6.745  | HSp300 BAC Ac p2 Ti 106.005153 | 4 | 16 |
| 1550 | ^ | Acetylation | 42 | KREENTSNESTDVTKGDSKNAKKKNNK        | 4.3212 | HSp300 BAC Ac p2 Ti 103.005160 | 6 | 1  |
| 1550 | ^ | Acetylation | 42 | N A K K K N N K K T S K            | 3.2284 | HSp300 BAC Ac p2 Ti 105.004578 | 5 | 4  |
| 1550 | ^ | Acetylation | 42 | N A K K K N N K K T S K N K        | 5.0177 | HSp300 BAC Ac p2 Ti 107.004983 | 6 | 6  |
| 1550 | ^ | Acetylation | 42 | K K N N K K T S K N K              | 4.3442 | HSp300 BAC Ac p2 Ti 106.004548 | 5 | 8  |
| 1550 | ^ | Acetylation | 42 | K K N N K K T S K N K S S L S R    | 5.1096 | HSp300 BAC Ac p2 Ti 110.005762 | 6 | 2  |
| 1550 | ^ | Acetylation | 42 | K K N N K K T S K N K S S L S R    | 6.114  | HSp300 BAC Ac p2 Ti 110.005782 | 6 | 5  |
| 1550 | ^ | Acetylation | 42 | KREENTSNESTDVTKGDSKNAKKK           | 4.9521 | HSp300 BAC Ac p3 Ti 105.009257 | 3 | 3  |
| 1550 | ^ | Acetylation | 42 | KREENTSNESTDVTKGDSKNAKKK           | 7.268  | HSp300 BAC Ac p3 Ti 103.006267 | 4 | 32 |
| 1550 | ^ | Acetylation | 42 | KREENTSNESTDVTKGDSKNAKKK           | 4.669  | HSp300 BAC Ac p3 Ti 101.006408 | 4 | 3  |
| 1550 | ^ | Acetylation | 42 | N A K K K N N K K T S K N K        | 4.5164 | HSp300 BAC Ac p3 Ti 107.005380 | 6 | 1  |
| 1550 | ^ | Acetylation | 42 | K K N N K K T S K N K              | 4.1769 | HSp300 BAC Ac p3 Ti 105.004862 | 5 | 7  |
| 1550 | ^ | Acetylation | 42 | K K N N K K T S K N K S S L S R    | 6.1708 | HSp300 BAC Ac p3 Ti 109.006174 | 6 | 7  |
| 1550 | ^ | Acetylation | 42 | K K N N K K T S K N K S S L S R    | 5.6066 | HSp300 BAC Ac p3 Ti 109.006164 | 6 | 5  |
| 1550 | ^ | Acetylation | 42 | A K K K N N K K T S K N K          | 3.3483 | HSp300 BAC Ac p2 CTI 110.00392 | 5 | 5  |
| 1550 | ^ | Acetylation | 42 | A K K K N N K K T S K N K S S L    | 3.9486 | HSp300 BAC Ac p2 CTI 111.00553 | 6 | 4  |
| 1550 | ^ | Acetylation | 42 | A K K K N N K K T S K N K          | 3.5911 | HSp300 BAC Ac p3 CTI 105.00434 | 5 | 3  |
| 1550 | ^ | Acetylation | 42 | A K K K N N K K T S K N K S S L    | 4.1891 | HSp300 BAC Ac p3 CTI 109.00496 | 5 | 1  |
| 1550 | ^ | Acetylation | 42 | A K K K N N K K T S K N K S S L    | 4.0104 | HSp300 BAC Ac p3 CTI 109.00492 | 5 | 1  |
| 1550 | ^ | Acetylation | 42 | A K K K N N K K T S K N K S S L    | 3.6245 | HSp300 BAC Ac p3 CTI 108.00555 | 6 | 2  |
| 1550 | ^ | Acetylation | 42 | K K K N N K K T S K N K S S L      | 4.0467 | HSp300 BAC Ac p3 CTI 108.00554 | 6 | 1  |
| 1550 | ^ |             | K  | ^ ^ ^ ^ ^                          |        |                                |   |    |









|      |   |             |    |   |                                        |        |                                |   |    |
|------|---|-------------|----|---|----------------------------------------|--------|--------------------------------|---|----|
| 1558 | ^ | Acetylation | 42 |   | KNNKKTSSKNK                            | 3.3173 | HsBAC p300 Ac p1 Ti 106.005517 | 4 | 3  |
| 1558 | ^ | Acetylation | 42 |   | KNNKKTSSKNKSSLSR                       | 3.6025 | HsBAC p300 Ac p1 Ti 107.006933 | 4 | 2  |
| 1558 | ^ | Acetylation | 42 |   | KNNKKTSSKNKSSLSR                       | 5.2801 | HsBAC p300 Ac p1 Ti 108.007143 | 5 | 5  |
| 1558 | ^ | Acetylation | 42 |   | KNNKKTSSKNKSSLSR                       | 5.7635 | HsBAC p300 Ac p1 Ti 106.006903 | 5 | 17 |
| 1558 | ^ | Acetylation | 42 |   | NNKKTSSKNKSSLSR                        | 4.9383 | HsBAC p300 Ac p1 Ti 106.006812 | 4 | 4  |
| 1558 | ^ | Acetylation | 42 |   | KTSKNKSSLSR                            | 3.9057 | HsBAC p300 Ac p1 Ti 105.006620 | 3 | 6  |
| 1558 | ^ | Acetylation | 42 |   | NAKKKNNKKTSSKNK                        | 5.0177 | HSp300 BAC Ac p2 Ti 107.004983 | 6 | 6  |
| 1558 | ^ | Acetylation | 42 |   | KNNKKTSSKNK                            | 4.3442 | HSp300 BAC Ac p2 Ti 106.004548 | 5 | 8  |
| 1558 | ^ | Acetylation | 42 |   | KNNKKTSSKNKSSLSR                       | 2.8532 | HSp300 BAC Ac p2 Ti 101.006495 | 3 | 1  |
| 1558 | ^ | Acetylation | 42 |   | KNNKKTSSKNKSSLSR                       | 5.1096 | HSp300 BAC Ac p2 Ti 110.005762 | 6 | 2  |
| 1558 | ^ | Acetylation | 42 |   | KNNKKTSSKNKSSLSR                       | 6.114  | HSp300 BAC Ac p2 Ti 110.005782 | 6 | 5  |
| 1558 | ^ | Acetylation | 42 |   | KNNKKTSSKNK                            | 3.1606 | HSp300 BAC Ac p2 Ti 103.003820 | 4 | 1  |
| 1558 | ^ | Acetylation | 42 |   | KNNKKTSSKNKSSLSR                       | 5.5703 | HSp300 BAC Ac p2 Ti 105.005462 | 5 | 11 |
| 1558 | ^ | Acetylation | 42 |   | KNNKKTSSKNKSSLSR                       | 4.7418 | HSp300 BAC Ac p2 Ti 107.005589 | 5 | 2  |
| 1558 | ^ | Acetylation | 42 |   | NNKKTSSKNK                             | 2.567  | HSp300 BAC Ac p2 Ti 104.003501 | 3 | 1  |
| 1558 | ^ | Acetylation | 42 |   | NNKKTSSKNKSSLSR                        | 4.8454 | HSp300 BAC Ac p2 Ti 105.005330 | 4 | 19 |
| 1558 | ^ | Acetylation | 42 |   | NNKKTSSKNKSSLSR                        | 4.6251 | HSp300 BAC Ac p2 Ti 101.005524 | 4 | 4  |
| 1558 | ^ | Acetylation | 42 |   | KTSKNKSSLSR                            | 3.7859 | HSp300 BAC Ac p2 Ti 104.004773 | 3 | 1  |
| 1558 | ^ | Acetylation | 42 |   | NAKKKNNKKTSSKNK                        | 4.5164 | HSp300 BAC Ac p3 Ti 107.005380 | 6 | 1  |
| 1558 | ^ | Acetylation | 42 |   | KNNKKTSSKNK                            | 4.1769 | HSp300 BAC Ac p3 Ti 105.004862 | 5 | 7  |
| 1558 | ^ | Acetylation | 42 |   | KNNKKTSSKNKSSLSR                       | 6.1708 | HSp300 BAC Ac p3 Ti 109.006174 | 6 | 7  |
| 1558 | ^ | Acetylation | 42 |   | KNNKKTSSKNKSSLSR                       | 5.6066 | HSp300 BAC Ac p3 Ti 109.006164 | 6 | 5  |
| 1558 | ^ | Acetylation | 42 |   | KNNKKTSSKNK                            | 2.8627 | HSp300 BAC Ac p3 Ti 103.004650 | 4 | 1  |
| 1558 | ^ | Acetylation | 42 |   | KNNKKTSSKNKSSLSR                       | 4.8026 | HSp300 BAC Ac p3 Ti 111.005746 | 4 | 5  |
| 1558 | ^ | Acetylation | 42 |   | KNNKKTSSKNKSSLSR                       | 5.3804 | HSp300 BAC Ac p3 Ti 107.005985 | 5 | 5  |
| 1558 | ^ | Acetylation | 42 |   | KNNKKTSSKNKSSLSR                       | 5.519  | HSp300 BAC Ac p3 Ti 103.005996 | 5 | 4  |
| 1558 | ^ | Acetylation | 42 |   | NNKKTSSKNK                             | 2.8624 | HSp300 BAC Ac p3 Ti 101.001023 | 3 | 2  |
| 1558 | ^ | Acetylation | 42 |   | NNKKTSSKNKSSLSR                        | 4.674  | HSp300 BAC Ac p3 Ti 104.005756 | 4 | 6  |
| 1558 | ^ | Acetylation | 42 |   | KTSKNKSSLSR                            | 4.0055 | HSp300 BAC Ac p3 Ti 103.005492 | 3 | 6  |
| 1558 | ^ | Acetylation | 42 |   | AKKKNNKKTSSKN                          | 3.3483 | HSp300 BAC Ac p2 CTI 110.00392 | 5 | 5  |
| 1558 | ^ | Acetylation | 42 |   | AKKKNNKKTSSKNSSLSR                     | 3.9486 | HSp300 BAC Ac p2 CTI 111.00553 | 6 | 4  |
| 1558 | ^ | Acetylation | 42 |   | NKKTSSKNKSSLSR                         | 2.9206 | HSp300 BAC Ac p2 CTI 106.00476 | 3 | 1  |
| 1558 | ^ | Acetylation | 42 |   | AKKKNNKKTSSKN                          | 3.1984 | HSp300 BAC Ac p3 CTI 110.00144 | 4 | 1  |
| 1558 | ^ | Acetylation | 42 |   | AKKKNNKKTSSKN                          | 3.5911 | HSp300 BAC Ac p3 CTI 105.00434 | 5 | 3  |
| 1558 | ^ | Acetylation | 42 |   | AKKKNNKKTSSKNSSLSR                     | 4.1891 | HSp300 BAC Ac p3 CTI 109.00496 | 5 | 1  |
| 1558 | ^ | Acetylation | 42 |   | AKKKNNKKTSSKNSSLSR                     | 4.0104 | HSp300 BAC Ac p3 CTI 109.00492 | 5 | 1  |
| 1558 | ^ | Acetylation | 42 |   | AKKKNNKKTSSKNSSLSR                     | 3.6245 | HSp300 BAC Ac p3 CTI 108.00555 | 6 | 2  |
| 1558 | ^ | Acetylation | 42 |   | KKKNNKKTSSKNKSSLSR                     | 4.0467 | HSp300 BAC Ac p3 CTI 108.00554 | 6 | 1  |
| 1558 | ^ |             | K  | ^ | ^ ^ ^ ^ ^ ^                            |        |                                |   |    |
| 1560 | ^ | Acetylation | 42 |   | NNKKTSSKNKSSLSR                        | 4.6597 | HsBAC p300 p1 NOMO Ti 103.0063 | 4 | 2  |
| 1560 | ^ | Acetylation | 42 |   | KREENTSNESTDVTGKDSKNAKKNNKKTSSKNKSSLSR | 4.2885 | HsBAC p300 Ac p1 Ti 105.007954 | 6 | 1  |
| 1560 | ^ | Acetylation | 42 |   | KNNKKTSSKNKSSLSR                       | 5.2262 | HsBAC p300 Ac p1 Ti 110.007799 | 6 | 1  |
| 1560 | ^ | Acetylation | 42 |   | KNNKKTSSKNKSSLSR                       | 6.3155 | HsBAC p300 Ac p1 Ti 109.007298 | 6 | 10 |
| 1560 | ^ | Acetylation | 42 |   | KNNKKTSSKNKSSLSR                       | 3.6025 | HsBAC p300 Ac p1 Ti 107.006933 | 4 | 2  |
| 1560 | ^ | Acetylation | 42 |   | KNNKKTSSKNKSSLSR                       | 5.2801 | HsBAC p300 Ac p1 Ti 108.007143 | 5 | 5  |
| 1560 | ^ | Acetylation | 42 |   | KNNKKTSSKNKSSLSR                       | 5.7635 | HsBAC p300 Ac p1 Ti 106.006903 | 5 | 17 |
| 1560 | ^ | Acetylation | 42 |   | NNKKTSSKNKSSLSR                        | 4.9383 | HsBAC p300 Ac p1 Ti 106.006812 | 4 | 4  |
| 1560 | ^ | Acetylation | 42 |   | KTSKNKSSLSR                            | 3.9057 | HsBAC p300 Ac p1 Ti 105.006620 | 3 | 6  |
| 1560 | ^ | Acetylation | 42 |   | KNNKKTSSKNKSSLSR                       | 2.8532 | HSp300 BAC Ac p2 Ti 101.006495 | 3 | 1  |
| 1560 | ^ | Acetylation | 42 |   | KNNKKTSSKNKSSLSR                       | 5.1096 | HSp300 BAC Ac p2 Ti 110.005762 | 6 | 2  |
| 1560 | ^ | Acetylation | 42 |   | KNNKKTSSKNKSSLSR                       | 6.114  | HSp300 BAC Ac p2 Ti 110.005782 | 6 | 5  |
| 1560 | ^ | Acetylation | 42 |   | KNNKKTSSKNKSSLSR                       | 5.5703 | HSp300 BAC Ac p2 Ti 105.005462 | 5 | 11 |
| 1560 | ^ | Acetylation | 42 |   | KNNKKTSSKNK                            | 4.7418 | HSp300 BAC Ac p2 Ti 107.005589 | 5 | 2  |
| 1560 | ^ | Acetylation | 42 |   | NNKKTSSKNKSSLSR                        | 4.8454 | HSp300 BAC Ac p2 Ti 105.005330 | 4 | 19 |
| 1560 | ^ | Acetylation | 42 |   | NNKKTSSKNKSSLSR                        | 4.6251 | HSp300 BAC Ac p2 Ti 101.005524 | 4 | 4  |
| 1560 | ^ | Acetylation | 42 |   | KTSKNKSSLSR                            | 3.7859 | HSp300 BAC Ac p2 Ti 104.004773 | 3 | 1  |
| 1560 | ^ | Acetylation | 42 |   | KNNKKTSSKNKSSLSR                       | 6.1708 | HSp300 BAC Ac p3 Ti 109.006174 | 6 | 7  |
| 1560 | ^ | Acetylation | 42 |   | KNNKKTSSKNKSSLSR                       | 5.6066 | HSp300 BAC Ac p3 Ti 109.006164 | 6 | 5  |
| 1560 | ^ | Acetylation | 42 |   | KNNKKTSSKNKSSLSR                       | 4.8026 | HSp300 BAC Ac p3 Ti 111.005746 | 4 | 5  |
| 1560 | ^ | Acetylation | 42 |   | KNNKKTSSKNKSSLSR                       | 5.3804 | HSp300 BAC Ac p3 Ti 107.005985 | 5 | 5  |
| 1560 | ^ | Acetylation | 42 |   | KNNKKTSSKNKSSLSR                       | 5.519  | HSp300 BAC Ac p3 Ti 103.005996 | 5 | 4  |
| 1560 | ^ | Acetylation | 42 |   | NNKKTSSKNKSSLSR                        | 4.674  | HSp300 BAC Ac p3 Ti 104.005756 | 4 | 6  |



|      |   |                     |       |                                                                           |        |                                |   |   |
|------|---|---------------------|-------|---------------------------------------------------------------------------|--------|--------------------------------|---|---|
| 1570 | ^ | Acetylation         | 42    | K P G M P N V S N D L S Q K                                               | 2.5306 | HSp300 BAC Ac p3 Ti 102.006521 | 1 | 1 |
| 1570 | ^ | Acetylation/Methion | 42/16 | K P G M P N V S N D L S Q K L Y A T M E K H K                             | 4.3823 | HSp300 BAC Ac p3 Ti 110.009851 | 4 | 1 |
| 1570 | ^ | Acetylation         | 42    | S R G N K K K P G M P N V S N D L S Q K L Y                               | 3.3762 | HSp300 BAC Ac p3 CTi 110.00852 | 3 | 1 |
| 1570 | ^ |                     | K     | ^ ^ ^ @ ^ ^                                                               |        |                                |   |   |
| 1583 | ^ | Acetylation         | 42    | G N K K K P G M P N V S N D L S Q K L Y A T M E K                         | 3.8428 | HsBAC p300 Ac p1 Ti 107.014379 | 4 | 1 |
| 1583 | ^ | Acetylation         | 42    | K P G M P N V S N D L S Q K L Y A T M E K                                 | 4.8077 | HsBAC p300 Ac p1 Ti 112.016048 | 1 | 6 |
| 1583 | ^ | Acetylation/Methion | 42/16 | K P G M P N V S N D L S Q K L Y A T M E K                                 | 3.847  | HsBAC p300 Ac p1 Ti 111.014956 | 2 | 1 |
| 1583 | ^ | Acetylation         | 42    | K P G M P N V S N D L S Q K L Y A T M E K                                 | 4.2107 | HsBAC p300 Ac p1 Ti 105.014393 | 2 | 4 |
| 1583 | ^ | Acetylation         | 42    | K K P G M P N V S N D L S Q K L Y A T M E K                               | 3.9917 | HsBAC p300 SIRT p1 Ti 111.0129 | 1 | 2 |
| 1583 | ^ | Acetylation         | 42    | K K P G M P N V S N D L S Q K L Y A T M E K                               | 5.3213 | HsBAC p300 SIRT p1 Ti 111.0128 | 1 | 4 |
| 1583 | ^ | Acetylation         | 42    | K P G M P N V S N D L S Q K L Y A T M E K                                 | 4.3423 | HsBAC p300 SIRT p1 Ti 109.0119 | 1 | 2 |
| 1583 | ^ | Acetylation         | 42    | K K P G M P N V S N D L S Q K L Y A T M E K                               | 3.4439 | HSp300 BAC DeAc p2 Ti 112.0095 | 1 | 1 |
| 1583 | ^ | Acetylation         | 42    | K P G M P N V S N D L S Q K L Y A T M E K                                 | 4.2641 | HSp300 BAC DeAc p2 Ti 105.0109 | 2 | 2 |
| 1583 | ^ | Acetylation         | 42    | K K P G M P N V S N D L S Q K L Y A T M E K                               | 5.019  | HSp300 BAC Ac p3 Ti 112.010061 | 1 | 1 |
| 1583 | ^ | Acetylation/Methion | 42/16 | K P G M P N V S N D L S Q K L Y A T M E K H K                             | 4.3823 | HSp300 BAC Ac p3 Ti 110.009851 | 4 | 1 |
| 1583 | ^ |                     | K     | ^ ^ ^ ^ @ ^ ^                                                             |        |                                |   |   |
| 1590 | ^ | Acetylation/Methion | 42/16 | K P G M P N V S N D L S Q K L Y A T M E K H K                             | 4.3823 | HSp300 BAC Ac p3 Ti 110.009851 | 4 | 1 |
| 1590 | ^ |                     | K     | ^ ^ @ ^ ^                                                                 |        |                                |   |   |
| 1674 | ^ | Acetylation         | 42    | F V Y T C N E C K H H V E T R                                             | 2.719  | HsBAC p300 Ac p1 Ti 110.009252 | 1 | 1 |
| 1674 | ^ | Acetylation         | 42    | F V Y T C N E C K H H V E T R                                             | 3.6385 | HSp300 BAC Ac p2 Ti 109.006192 | 1 | 6 |
| 1674 | ^ | Acetylation         | 42    | F V Y T C N E C K H H V E T R                                             | 4.1931 | HSp300 BAC DeAc p2 Ti 107.0055 | 1 | 5 |
| 1674 | ^ | Acetylation         | 42    | F V Y T C N E C K H H V E T R                                             | 4.4909 | HSp300 BAC Ac p3 Ti 107.006388 | 1 | 4 |
| 1674 | ^ | Acetylation         | 42    | T C N E C K H H V E T R W                                                 | 3.6384 | HSp300 BAC DeAc p2 CTi 105.005 | 1 | 2 |
| 1674 | ^ | Acetylation         | 42    | T C N E C K H H V E T R W                                                 | 4.3552 | HSp300 BAC Ac p3 CTi 104.00512 | 1 | 4 |
| 1674 | ^ | Acetylation         | 42    | T C N E C K H H V E T R W                                                 | 3.3232 | HSp300 BAC DeAc p3 CTi 103.004 | 1 | 2 |
| 1674 | ^ |                     | K     | ^                                                                         |        |                                |   |   |
| 1699 | ^ | Acetylation         | 42    | D Y D L C I T C Y N T K N H D H K M E                                     | 3.6558 | HSp300 BAC Ac Ec 102.007000.00 | 1 | 1 |
| 1699 | ^ | Acetylation         | 42    | D Y D L C I T C Y N T K N H D H K M E                                     | 4.7759 | HSp300 BAC Ac Ec 101.009336.00 | 2 | 2 |
| 1699 | ^ | Acetylation         | 42    | D Y D L C I T C Y N T K N H D H K M E                                     | 4.0489 | HSp300 BAC p3 Ac Ec 101.008912 | 1 | 2 |
| 1699 | ^ | Acetylation/Methion | 42/16 | D Y D L C I T C Y N T K N H D H K M E                                     | 3.5326 | HSp300 BAC p3 Ac Ec 101.008946 | 2 | 1 |
| 1699 | ^ | Acetylation         | 42    | N T K N H D H K M E K L                                                   | 3.7024 | HSp300 BAC Ac p2 CTi 110.00487 | 2 | 3 |
| 1699 | ^ | Acetylation/Methion | 42/16 | N T K N H D H K M E K L                                                   | 2.9128 | HSp300 BAC Ac p2 CTi 107.00481 | 4 | 2 |
| 1699 | ^ | Acetylation         | 42    | N T K N H D H K M E K L G L G L D D E S N N Q Q A A A T Q S P G D S R R L | 4.3532 | HSp300 BAC Ac p2 CTi 109.00764 | 3 | 1 |
| 1699 | ^ | Acetylation         | 42    | N T K N H D H K M E K L                                                   | 2.572  | HSp300 BAC DeAc p2 CTi 106.005 | 2 | 1 |
| 1699 | ^ | Acetylation         | 42    | N T K N H D H K M E K L                                                   | 3.9747 | HSp300 BAC Ac p3 CTi 108.00432 | 1 | 7 |
| 1699 | ^ | Acetylation         | 42    | N T K N H D H K M E K L                                                   | 3.2463 | HSp300 BAC Ac p3 CTi 105.00501 | 2 | 3 |
| 1699 | ^ | Acetylation         | 42    | N T K N H D H K M E K L                                                   | 3.1158 | HSp300 BAC Ac p3 CTi 106.00490 | 2 | 3 |
| 1699 | ^ | Acetylation         | 42    | N T K N H D H K M E K L                                                   | 3.7432 | HSp300 BAC Ac p3 CTi 105.00494 | 2 | 4 |
| 1699 | ^ | Acetylation         | 42    | N T K N H D H K M E K L                                                   | 2.8866 | HSp300 BAC Ac p3 CTi 103.00562 | 3 | 2 |
| 1699 | ^ | Acetylation         | 42    | N T K N H D H K M E K L                                                   | 3.2992 | HSp300 BAC Ac p3 CTi 103.00557 | 3 | 1 |
| 1699 | ^ | Acetylation/Methion | 42/16 | N T K N H D H K M E K L                                                   | 2.537  | HSp300 BAC Ac p3 CTi 103.00487 | 4 | 2 |
| 1699 | ^ | Acetylation         | 42    | N T K N H D H K M E K L G L G L D D E S N N Q Q A A A T Q S P G D S R R L | 3.9425 | HSp300 BAC Ac p3 CTi 108.00679 | 2 | 1 |
| 1699 | ^ | Acetylation         | 42    | N T K N H D H K M E K L G L G L D D E S N N Q Q A A A T Q S P G D S R R L | 5.1267 | HSp300 BAC Ac p3 CTi 105.00755 | 3 | 2 |
| 1699 | ^ | Acetylation         | 42    | N T K N H D H K M E K L                                                   | 4.0552 | HSp300 BAC DeAc p3 CTi 107.003 | 1 | 5 |
| 1699 | ^ |                     | K     | ^ @ ^                                                                     |        |                                |   |   |
| 1704 | ^ | Acetylation         | 42    | N H D H K M E K L G L G L D D E S N N Q Q A A A T Q S P G D S R           | 5.9457 | HsBAC p300 Ac p1 Ti 106.011969 | 2 | 8 |
| 1704 | ^ | Acetylation         | 42    | N H D H K M E K L G L G L D D E S N N Q Q A A A T Q S P G D S R           | 3.9701 | HSp300 BAC Ac p3 Ti 103.009486 | 2 | 1 |
| 1704 | ^ | Acetylation         | 42    | D Y D L C I T C Y N T K N H D H K M E                                     | 4.7759 | HSp300 BAC Ac Ec 101.009336.00 | 2 | 2 |
| 1704 | ^ | Acetylation         | 42    | N T K N H D H K M E K L                                                   | 3.7525 | HSp300 BAC Ac p2 CTi 110.00529 | 2 | 1 |
| 1704 | ^ | Acetylation         | 42    | N T K N H D H K M E K L                                                   | 3.7024 | HSp300 BAC Ac p2 CTi 110.00487 | 2 | 3 |
| 1704 | ^ | Acetylation/Methion | 42/16 | N T K N H D H K M E K L                                                   | 2.9128 | HSp300 BAC Ac p2 CTi 107.00481 | 4 | 2 |
| 1704 | ^ | Acetylation         | 42    | N T K N H D H K M E K L G L G L D D E S N N Q Q A A A T Q S P G D S R R L | 4.3532 | HSp300 BAC Ac p2 CTi 109.00764 | 3 | 1 |
| 1704 | ^ | Acetylation         | 42    | N T K N H D H K M E K L                                                   | 2.572  | HSp300 BAC DeAc p2 CTi 106.005 | 2 | 1 |
| 1704 | ^ | Acetylation         | 42    | N T K N H D H K M E K L                                                   | 2.8162 | HSp300 BAC Ac p3 CTi 109.00418 | 1 | 1 |

|      |   |                     |       |                                        |        |                                |   |   |
|------|---|---------------------|-------|----------------------------------------|--------|--------------------------------|---|---|
| 1704 | ^ | Acetylation         | 42    | NTKNHDKMEKL                            | 3.2463 | HSp300 BAC Ac p3 CTi 105.00501 | 2 | 3 |
| 1704 | ^ | Acetylation         | 42    | NTKNHDKMEKL                            | 3.7432 | HSp300 BAC Ac p3 CTi 105.00494 | 2 | 4 |
| 1704 | ^ | Acetylation         | 42    | NTKNHDKMEKL                            | 2.8866 | HSp300 BAC Ac p3 CTi 103.00562 | 3 | 2 |
| 1704 | ^ | Acetylation         | 42    | NTKNHDKMEKL                            | 3.2992 | HSp300 BAC Ac p3 CTi 103.00557 | 3 | 1 |
| 1704 | ^ | Acetylation/Methion | 42/16 | NTKNHDKMEKL                            | 2.537  | HSp300 BAC Ac p3 CTi 103.00487 | 4 | 2 |
| 1704 | ^ | Acetylation         | 42    | NTKNHDKMEKLGGLGLDDESNNQAAAAATQSPGDSRRL | 5.1267 | HSp300 BAC Ac p3 CTi 105.00755 | 3 | 2 |
| 1704 | ^ | Acetylation         | 42    | NTKNHDKMEKL                            | 2.7424 | HSp300 BAC DeAc p3 CTi 108.003 | 1 | 1 |
| 1704 | ^ |                     | K     | ^ @ ^                                  |        |                                |   |   |
| 1707 | ^ | Acetylation         | 42    | NHDKMEKLGGLGLDDESNNQAAAAATQSPGDSR      | 5.9457 | HsBAC p300 Ac p1 Ti 106.011969 | 2 | 8 |
| 1707 | ^ | Acetylation         | 42    | MEKLGGLGLDDESNNQAAAAATQSPGDSR          | 4.0892 | HsBAC p300 Ac p1 Ti 102.009218 | 1 | 1 |
| 1707 | ^ | Acetylation         | 42    | MEKLGGLGLDDESNNQAAAAATQSPGDSR          | 4.6188 | HsBAC p300 Ac p1 Ti 102.009178 | 1 | 2 |
| 1707 | ^ | Acetylation         | 42    | MEKLGGLGLDDESNNQAAAAATQSPGDSRR         | 3.5815 | HsBAC p300 Ac p1 Ti 105.009141 | 1 | 1 |
| 1707 | ^ | Acetylation         | 42    | MEKLGGLGLDDESNNQAAAAATQSPGDSR          | 4.7711 | HsBAC p300 SIRT p1 Ti 102.0087 | 1 | 1 |
| 1707 | ^ | Acetylation         | 42    | MEKLGGLGLDDESNNQAAAAATQSPGDSR          | 4.6326 | HSp300 BAC Ac p2 Ti 101.008774 | 1 | 1 |
| 1707 | ^ | Acetylation         | 42    | MEKLGGLGLDDESNNQAAAAATQSPGDSR          | 3.74   | HSp300 BAC Ac p2 Ti 102.007408 | 1 | 1 |
| 1707 | ^ | Acetylation         | 42    | MEKLGGLGLDDESNNQAAAAATQSPGDSRR         | 5.5292 | HSp300 BAC Ac p2 Ti 103.006848 | 1 | 1 |
| 1707 | ^ | Acetylation         | 42    | NHDKMEKLGGLGLDDESNNQAAAAATQSPGDSR      | 3.9701 | HSp300 BAC Ac p3 Ti 103.009486 | 2 | 1 |
| 1707 | ^ | Acetylation         | 42    | MEKLGGLGLDDESNNQAAAAATQSPGDSR          | 5.0863 | HSp300 BAC Ac p3 Ti 101.009696 | 1 | 3 |
| 1707 | ^ | Acetylation         | 42    | MEKLGGLGLDDESNNQAAAAATQSPGDSRR         | 5.0309 | HSp300 BAC Ac p3 Ti 103.007732 | 1 | 2 |
| 1707 | ^ | Acetylation         | 42    | NTKNHDKMEKL                            | 3.7525 | HSp300 BAC Ac p2 CTi 110.00529 | 2 | 1 |
| 1707 | ^ | Acetylation/Methion | 42/16 | NTKNHDKMEKL                            | 2.9128 | HSp300 BAC Ac p2 CTi 107.00481 | 4 | 2 |
| 1707 | ^ | Acetylation         | 42    | NTKNHDKMEKLGGLGLDDESNNQAAAAATQSPGDSRRL | 4.3532 | HSp300 BAC Ac p2 CTi 109.00764 | 3 | 1 |
| 1707 | ^ | Acetylation         | 42    | NTKNHDKMEKL                            | 3.1158 | HSp300 BAC Ac p3 CTi 106.00490 | 2 | 3 |
| 1707 | ^ | Acetylation         | 42    | NTKNHDKMEKL                            | 2.8866 | HSp300 BAC Ac p3 CTi 103.00562 | 3 | 2 |
| 1707 | ^ | Acetylation         | 42    | NTKNHDKMEKL                            | 3.2992 | HSp300 BAC Ac p3 CTi 103.00557 | 3 | 1 |
| 1707 | ^ | Acetylation/Methion | 42/16 | NTKNHDKMEKL                            | 2.537  | HSp300 BAC Ac p3 CTi 103.00487 | 4 | 2 |
| 1707 | ^ | Acetylation         | 42    | NTKNHDKMEKLGGLGLDDESNNQAAAAATQSPGDSRRL | 3.9425 | HSp300 BAC Ac p3 CTi 108.00679 | 2 | 1 |
| 1707 | ^ | Acetylation         | 42    | NTKNHDKMEKLGGLGLDDESNNQAAAAATQSPGDSRRL | 5.1267 | HSp300 BAC Ac p3 CTi 105.00755 | 3 | 2 |
| 1707 | ^ |                     | K     | ^ @ ^                                  |        |                                |   |   |
| 1760 | ^ | Acetylation         | 42    | NANCSLPSCQKMKR                         | 4.1797 | HsBAC p300 Ac p1 Ti 105.007472 | 2 | 6 |
| 1760 | ^ | Acetylation         | 42    | NANCSLPSCQKMK                          | 3.5714 | HSp300 BAC Ac p2 Ti 104.005272 | 1 | 2 |
| 1760 | ^ | Acetylation         | 42    | NANCSLPSCQKMKR                         | 2.2953 | HSp300 BAC Ac p2 Ti 101.006275 | 2 | 2 |
| 1760 | ^ | Acetylation         | 42    | NANCSLPSCQKMKR                         | 4.5461 | HSp300 BAC Ac p2 Ti 103.005504 | 2 | 9 |
| 1760 | ^ | Acetylation/Methion | 42/16 | NANCSLPSCQKMKR                         | 2.8396 | HSp300 BAC Ac p2 Ti 107.005405 | 3 | 1 |
| 1760 | ^ | Acetylation         | 42    | NANCSLPSCQKMKR                         | 2.7061 | HSp300 BAC DeAc p2 Ti 103.0053 | 2 | 2 |
| 1760 | ^ | Acetylation/Methion | 42/16 | NANCSLPSCQKMKR                         | 4.2205 | HSp300 BAC DeAc p2 Ti 104.0050 | 3 | 2 |
| 1760 | ^ | Acetylation/Methion | 42/16 | NANCSLPSCQKMK                          | 3.2125 | HSp300 BAC Ac p3 Ti 102.005345 | 2 | 1 |
| 1760 | ^ | Acetylation         | 42    | NANCSLPSCQKMKR                         | 3.9701 | HSp300 BAC Ac p3 Ti 105.006276 | 2 | 8 |
| 1760 | ^ | Acetylation/Methion | 42/16 | NANCSLPSCQKMKR                         | 4.1389 | HSp300 BAC Ac p3 Ti 105.005720 | 3 | 3 |
| 1760 | ^ |                     | K     | ^ @ ^                                  |        |                                |   |   |
| 1762 | ^ | Acetylation         | 42    | NANCSLPSCQKMKR                         | 4.1797 | HsBAC p300 Ac p1 Ti 105.007472 | 2 | 6 |
| 1762 | ^ | Acetylation         | 42    | NANCSLPSCQKMKR                         | 2.2953 | HSp300 BAC Ac p2 Ti 101.006275 | 2 | 2 |
| 1762 | ^ | Acetylation         | 42    | NANCSLPSCQKMKR                         | 4.5461 | HSp300 BAC Ac p2 Ti 103.005504 | 2 | 9 |
| 1762 | ^ | Acetylation/Methion | 42/16 | NANCSLPSCQKMKR                         | 2.8396 | HSp300 BAC Ac p2 Ti 107.005405 | 3 | 1 |
| 1762 | ^ | Acetylation         | 42    | NANCSLPSCQKMKR                         | 2.7061 | HSp300 BAC DeAc p2 Ti 103.0053 | 2 | 2 |
| 1762 | ^ | Acetylation/Methion | 42/16 | NANCSLPSCQKMKR                         | 4.2205 | HSp300 BAC DeAc p2 Ti 104.0050 | 3 | 2 |
| 1762 | ^ | Acetylation/Methion | 42/16 | NANCSLPSCQKMK                          | 3.2125 | HSp300 BAC Ac p3 Ti 102.005345 | 2 | 1 |
| 1762 | ^ | Acetylation         | 42    | NANCSLPSCQKMKR                         | 3.9701 | HSp300 BAC Ac p3 Ti 105.006276 | 2 | 8 |
| 1762 | ^ | Acetylation/Methion | 42/16 | NANCSLPSCQKMKR                         | 4.1389 | HSp300 BAC Ac p3 Ti 105.005720 | 3 | 3 |
| 1762 | ^ |                     | K     | ^ @ ^                                  |        |                                |   |   |
| 1769 | ^ | Acetylation         | 42    | RVVQHTKGCK                             | 3.0593 | HsBAC p300 Ac p1 Ti 113.010164 | 1 | 2 |
| 1769 | ^ | Acetylation         | 42    | VVQHTKGCKR                             | 3.3403 | HsBAC p300 Ac p1 Ti 111.012572 | 2 | 3 |
| 1769 | ^ | Acetylation         | 42    | VVQHTKGCKR                             | 3.0141 | HsBAC p300 Ac p1 Ti 111.012586 | 2 | 4 |
| 1769 | ^ | Acetylation         | 42    | RVVQHTKGCK                             | 3.3654 | HsBAC p300 SIRT p1 Ti 111.0096 | 1 | 2 |
| 1769 | ^ | Acetylation         | 42    | RVVQHTKGCKR                            | 3.7861 | HsBAC p300 SIRT p1 Ti 113.0099 | 2 | 2 |
| 1769 | ^ | Acetylation         | 42    | RVVQHTKGCK                             | 3.0966 | HSp300 BAC Ac p2 Ti 112.003039 | 1 | 2 |
| 1769 | ^ | Acetylation         | 42    | RVVQHTKGCKR                            | 3.6777 | HSp300 BAC Ac p2 Ti 113.002493 | 2 | 5 |
| 1769 | ^ | Acetylation         | 42    | VVQHTKGCKR                             | 2.6426 | HSp300 BAC Ac p2 Ti 110.004534 | 2 | 3 |

|      |   |             |    |                                         |        |                                |   |    |
|------|---|-------------|----|-----------------------------------------|--------|--------------------------------|---|----|
| 1769 | ^ | Acetylation | 42 | V V Q H T K G C K R                     | 3.3147 | HSp300 BAC Ac p2 Ti 110.003657 | 2 | 16 |
| 1769 | ^ | Acetylation | 42 | V V Q H T K G C K R                     | 3.0976 | HSp300 BAC DeAc p2 Ti 108.0036 | 2 | 6  |
| 1769 | ^ | Acetylation | 42 | R V V Q H T K G C K                     | 3.3051 | HSp300 BAC Ac p3 Ti 112.002648 | 1 | 2  |
| 1769 | ^ | Acetylation | 42 | R V V Q H T K G C K R                   | 3.9884 | HSp300 BAC Ac p3 Ti 112.007472 | 2 | 7  |
| 1769 | ^ | Acetylation | 42 | V V Q H T K G C K R                     | 3.2946 | HSp300 BAC Ac p3 Ti 110.003272 | 2 | 18 |
| 1769 | ^ |             | K  | △                                       |        |                                |   |    |
| 1772 | ^ | Acetylation | 42 | V V Q H T K G C K R                     | 3.3403 | HsBAC p300 Ac p1 Ti 111.012572 | 2 | 3  |
| 1772 | ^ | Acetylation | 42 | V V Q H T K G C K R                     | 3.0141 | HsBAC p300 Ac p1 Ti 111.012586 | 2 | 4  |
| 1772 | ^ | Acetylation | 42 | R V V Q H T K G C K R                   | 3.7861 | HsBAC p300 SIRT p1 Ti 113.0099 | 2 | 2  |
| 1772 | ^ | Acetylation | 42 | R V V Q H T K G C K R                   | 3.6777 | HSp300 BAC Ac p2 Ti 113.002493 | 2 | 5  |
| 1772 | ^ | Acetylation | 42 | V V Q H T K G C K R                     | 2.6426 | HSp300 BAC Ac p2 Ti 110.004534 | 2 | 3  |
| 1772 | ^ | Acetylation | 42 | V V Q H T K G C K R                     | 3.3147 | HSp300 BAC Ac p2 Ti 110.003657 | 2 | 16 |
| 1772 | ^ | Acetylation | 42 | V V Q H T K G C K R                     | 3.0976 | HSp300 BAC DeAc p2 Ti 108.0036 | 2 | 6  |
| 1772 | ^ | Acetylation | 42 | R V V Q H T K G C K R                   | 3.9884 | HSp300 BAC Ac p3 Ti 112.007472 | 2 | 7  |
| 1772 | ^ | Acetylation | 42 | V V Q H T K G C K R                     | 3.2946 | HSp300 BAC Ac p3 Ti 110.003272 | 2 | 18 |
| 1772 | ^ |             | K  | △                                       |        |                                |   |    |
| 1774 | ^ | Acetylation | 42 | K T N G G C P I C K                     | 2.9402 | HSp300 BAC Ac p3 Ti 101.003470 | 1 | 2  |
| 1774 | ^ |             | K  | △                                       |        |                                |   |    |
| 1783 | ^ | Acetylation | 42 | T N G G C P I C K Q L I A L C C Y H A K | 2.8003 | HSp300 BAC DeAc p2 Ti 109.0089 | 1 | 1  |
| 1783 | ^ | Acetylation | 42 | T N G G C P I C K Q L I A L C C Y H A K | 3.8138 | HSp300 BAC DeAc p2 Ti 110.0090 | 1 | 2  |
| 1783 | ^ |             | K  | △                                       |        |                                |   |    |
| 1794 | ^ | Acetylation | 42 | Q L I A L C C Y H A K H C Q E N K       | 3.4447 | HsBAC p300 Ac p1 Ti 113.011726 | 1 | 1  |
| 1794 | ^ | Acetylation | 42 | Q L I A L C C Y H A K H C Q E N K       | 3.5026 | HSp300 BAC Ac p2 Ti 112.008144 | 1 | 1  |
| 1794 | ^ | Acetylation | 42 | Q L I A L C C Y H A K H C Q E N K       | 4.0474 | HSp300 BAC DeAc p2 Ti 111.0066 | 1 | 1  |
| 1794 | ^ | Acetylation | 42 | Q L I A L C C Y H A K H C Q E N K       | 3.8432 | HSp300 BAC DeAc p2 Ti 108.0067 | 1 | 3  |
| 1794 | ^ | Acetylation | 42 | Q L I A L C C Y H A K H C Q E N K       | 4.1641 | HSp300 BAC Ac p3 Ti 111.007088 | 1 | 5  |
| 1794 | ^ | Acetylation | 42 | H A K H C Q E N K C P V P F             | 3.4024 | HSp300 BAC DeAc p3 CTI 108.005 | 1 | 2  |
| 1794 | ^ |             | K  | △                                       |        |                                |   |    |
| 1800 | ^ | Acetylation | 42 | H C Q E N K C P V P F C L N I K         | 4.5462 | HSp300 BAC DeAc p2 Ti 107.0080 | 1 | 1  |
| 1800 | ^ | Acetylation | 42 | H C Q E N K C P V P F C L N I K Q K L R | 3.2324 | HSp300 BAC Ac p3 Ti 113.010520 | 3 | 1  |
| 1800 | ^ | Acetylation | 42 | H C Q E N K C P V P F C L N I K Q K L R | 3.72   | HSp300 BAC Ac p3 Ti 112.010437 | 3 | 2  |
| 1800 | ^ |             | K  | △                                       |        |                                |   |    |
| 1810 | ^ | Acetylation | 42 | C P V P F C L N I K Q K L R             | 3.7497 | HSp300 BAC Ac p2 Ti 112.010238 | 2 | 2  |
| 1810 | ^ | Acetylation | 42 | C P V P F C L N I K Q K                 | 3.4488 | HSp300 BAC DeAc p2 Ti 107.0083 | 1 | 3  |
| 1810 | ^ | Acetylation | 42 | C P V P F C L N I K Q K L R             | 4.9394 | HSp300 BAC DeAc p2 Ti 110.0108 | 2 | 2  |
| 1810 | ^ | Acetylation | 42 | H C Q E N K C P V P F C L N I K Q K L R | 3.2324 | HSp300 BAC Ac p3 Ti 113.010520 | 3 | 1  |
| 1810 | ^ | Acetylation | 42 | H C Q E N K C P V P F C L N I K Q K L R | 3.72   | HSp300 BAC Ac p3 Ti 112.010437 | 3 | 2  |
| 1810 | ^ | Acetylation | 42 | C P V P F C L N I K Q K                 | 2.8132 | HSp300 BAC Ac p3 Ti 105.008950 | 1 | 1  |
| 1810 | ^ | Acetylation | 42 | C P V P F C L N I K Q K L R             | 4.8039 | HSp300 BAC Ac p3 Ti 112.010655 | 2 | 4  |
| 1810 | ^ | Acetylation | 42 | C P V P F C L N I K Q K L R             | 3.7893 | HSp300 BAC Ac p3 Ti 112.010647 | 2 | 2  |
| 1810 | ^ |             | K  | △                                       |        |                                |   |    |
| 1812 | ^ | Acetylation | 42 | C P V P F C L N I K Q K L R             | 3.7497 | HSp300 BAC Ac p2 Ti 112.010238 | 2 | 2  |
| 1812 | ^ | Acetylation | 42 | C P V P F C L N I K Q K L R             | 4.9394 | HSp300 BAC DeAc p2 Ti 110.0108 | 2 | 2  |
| 1812 | ^ | Acetylation | 42 | H C Q E N K C P V P F C L N I K Q K L R | 3.2324 | HSp300 BAC Ac p3 Ti 113.010520 | 3 | 1  |
| 1812 | ^ | Acetylation | 42 | H C Q E N K C P V P F C L N I K Q K L R | 3.72   | HSp300 BAC Ac p3 Ti 112.010437 | 3 | 2  |
| 1812 | ^ | Acetylation | 42 | C P V P F C L N I K Q K L R             | 4.8039 | HSp300 BAC Ac p3 Ti 112.010655 | 2 | 4  |
| 1812 | ^ | Acetylation | 42 | C P V P F C L N I K Q K L R             | 3.7893 | HSp300 BAC Ac p3 Ti 112.010647 | 2 | 2  |
| 1812 | ^ |             | K  | △                                       |        |                                |   |    |
